# Supplementary material for: Copper-catalyzed synthesis of 2-aminobenzothiazoles from carbodiimide and sodium hydrosulfide
Source: Royal Society of Chemistry journal article supplement (doi:10.1039/c4ra04047c), 2014-01-01
Supplement: c4ra04047c1.pdf [file c4ra04047c1.pdf]

## **Copper-Catalyzed Synthesis of 2-Aminobenzothiazoles from Carbodiimide and Sodium Hydrosulfide**

Weilan Zeng,<sup>a</sup> Pan Dang,<sup>a</sup> Xiaoyun Zhang,<sup>a</sup> Yun Liang,<sup>\*,a</sup> Caiyun Peng<sup>\*,b</sup>

<sup>a</sup> Key Laboratory of Chemical Biology and Traditional Chinese Medicine Research, Ministry of Education, Key Laboratory of Resource Fine-Processing and Advanced Materials of Hunan Province, Hunan Normal University, Changsha, Hunan 410081, China. E-mail: yliang@hunnu.edu.cn, paudy@126.com. Fax: +86(0731)88872533

<sup>b</sup> School of Pharmaceutical Science, Hunan University of Chinese Medicine, Changsha, Hunan, 410208, China.

### **Supporting Information**

- 1) General Information S2
- 2) Synthesis of Starting Materials S2
- 3) Typical Procedures S3
- 4) Characterization Data S3-S8
- 5) References S9
- 6) Scanned <sup>1</sup>H NMR and <sup>13</sup>C NMR Spectra of All New Compounds S10-S29

## 1) General Information

NMR spectra of the products **2a**, **2k** were obtained using Bruker Avance-500 instruments, calibrated to TMS ( $^1\text{H}$  NMR spectra) and  $\text{CD}(\text{H})\text{Cl}_3$  ( $^{13}\text{C}$  NMR spectra) as the internal reference (0.00 ppm for  $^1\text{H}$  NMR spectra and 77.00 ppm for  $^{13}\text{C}$  NMR spectra). NMR spectra of the product **2b-2t** was recorded using Bruker Avance-500 instruments, calibrated to residual  $\text{DMSO-}d_6$  as the internal reference (2.50 ppm for  $^1\text{H}$  NMR spectra and 40.00 ppm for  $^{13}\text{C}$  NMR spectra). High-resolution massspectra (HRMS) were recorded on a Bruker Apex IV FTMS mass spectrometer using ESI (electrospray ionization). Reactions were monitored by thin-layer chromatography. Column chromatography (petroleum ether/ethyl acetate) was performed on silica gel (200-300 mesh). Unless otherwise noted, all reactions were run under nitrogen atmosphere.

## 2) Synthesis of Starting Materials

### Preparation of 1a-1t:

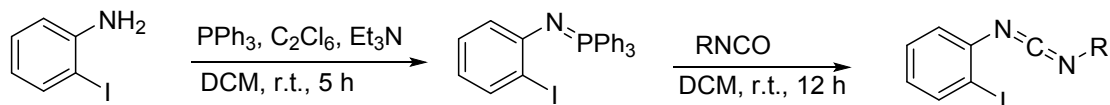

### General Procedure for the Synthesis of Aza-Wittig Reagents

To a mixture of 2-iodoaniline (1.00 g, 4.57 mmol),  $\text{PPh}_3$  (1.80 g, 6.86 mmol) and  $\text{C}_2\text{Cl}_6$  (1.62 g, 6.86 mmol) in dry  $\text{CH}_2\text{Cl}_2$  (40 mL),  $\text{Et}_3\text{N}$  (1.40 g, 13.84 mmol) was added dropwise at 25 °C. After being stirred for 5 h, the reaction mixture was concentrated under reduced pressure. The residue was extracted by EtOAc (100 mL), filtered through Celite (5 cm). All the volatiles were removed under reduced pressure. Isolation by silica gel column chromatography with EtOAc/ petroleum ether (v/v = 1:6) as the eluant afforded white solid (1.30 g, 98 %).

### General Procedure for the Synthesis of *O*-iodoarylcarbodiimides 1a-1t.

To a stirred solution of an aza-Wittig reagent (10 mmol) in  $\text{CH}_2\text{Cl}_2$  (50 mL), an isocyanate  $\text{R}_2\text{-NCO}$  (10 mmol) was added dropwise, and then the resulting mixture was stirred at room temperature for 12 h. The solvent was evaporated under reduced pressure. Isolation by silica gel column chromatography with EtOAc/ petroleum ether (v/v = 1:12) as the eluent afforded the corresponding *o*-iodoarylcarbodiimides 1a-1t.

### 3) Typical Procedures

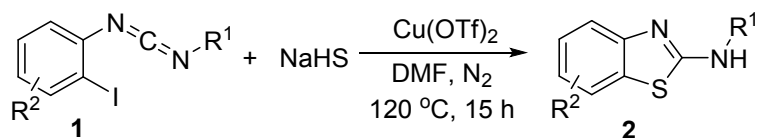

To a schlenk tube were added *o*-iodoarylcarbodiimides (0.3 mmol), NaHS (3equiv), Cu(OTf)<sub>2</sub> (20 mol%), and DMF (2 mL). Then under the protection of nitrogen, the mixture was stirred at 120 °C (oil bath temperature) for the indicated time until complete consumption of starting material as monitored by TLC. After the reaction was finished, the reaction mixture was cooled to room temperature, diluted in ethyl acetate, and washed with water. The aqueous phase was re-extracted with ethyl acetate. The combined organic extracts were dried over Na<sub>2</sub>SO<sub>4</sub> and concentrated in vacuum, and the resulting residue was purified by silica gel column chromatography (petroleum ether/ethyl acetate = 5:1) to afford the desired product.

### 4) Characterization Data

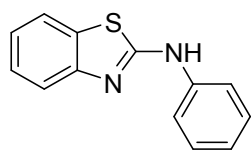

**N-phenylbenzo[d]thiazol-2-amine(2a):**<sup>1</sup> The product was purified by flash chromatography to give 63 mg (74%) as a yellow solid. <sup>1</sup>H NMR (CDCl<sub>3</sub>, 500 MHz) δ = 7.60 (d, *J* = 8.0 Hz, 1H), 7.54 (d, *J* = 8.0 Hz, 1H), 7.49 (d, *J* = 8.0 Hz, 2H), 7.38 (t, *J* = 7.8 Hz, 2H), 7.30 (t, *J* = 7.5 Hz, 1H), 7.17-7.11 (m, 2H). <sup>13</sup>C NMR (CDCl<sub>3</sub>, 125 MHz) δ = 165.2, 151.3, 140.0, 129.8, 129.5, 126.1, 124.4, 122.3, 120.8, 120.5, 119.2.

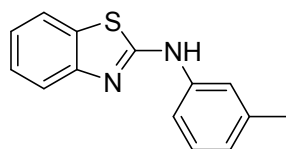

**N-(m-tolyl)benzo[d]thiazol-2-amine(2b):**<sup>1</sup> The product was purified by flash chromatography to give 66 mg (93%) as a yellow solid. <sup>1</sup>H NMR (DMSO-*D*<sub>6</sub>, 500 MHz) δ = 10.42 (s, 1H), 7.79 (d, *J* = 7.5 Hz, 1H), 7.66 (d, *J* = 8.0 Hz, 1H), 7.62 (d, *J* = 8.0 Hz, 2H), 7.32 (td, *J* = 7.5 Hz, 1.0 Hz, 1H), 7.24 (t, *J* = 7.8 Hz, 1H), 7.14 (td, *J* = 8.0 Hz, 1.0 Hz, 1H), 6.84 (d, *J* = 7.5 Hz, 1H), 2.32 (s, 3H). <sup>13</sup>C NMR (DMSO-*D*<sub>6</sub>, 125 MHz) δ = 162.2, 152.6, 141.1, 138.7, 130.5, 129.3, 126.3, 123.4, 122.7, 121.5, 119.7, 118.8, 115.6, 21.8.

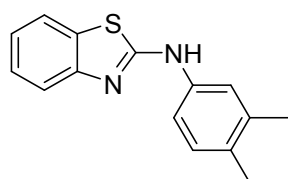

**N-(3,4-dimethylphenyl)benzo[d]thiazol-2-amine(2c):**<sup>8</sup> The product was purified by flash chromatography to give 75 mg (95%) as a yellow solid. <sup>1</sup>H NMR (DMSO-*D*<sub>6</sub>, 500 MHz)  $\delta$  = 10.30 (s, 1H), 7.76 (dd,  $J$  = 7.5 Hz, 1.0 Hz, 1H), 7.59-7.56 (m, 2H), 7.49 (d,  $J$  = 2.0 Hz, 1H), 7.30 (td,  $J$  = 8.0 Hz, 1.0 Hz, 1H), 7.14-7.10 (m, 2H), 2.22 (s, 3H), 2.17 (s, 3H). <sup>13</sup>C NMR (DMSO-*D*<sub>6</sub>, 125 MHz)  $\delta$  = 162.4, 152.7, 139.0, 137.1, 130.5, 130.4, 130.3, 126.3, 122.5, 121.4, 119.8, 119.5, 116.1, 20.2, 19.2.

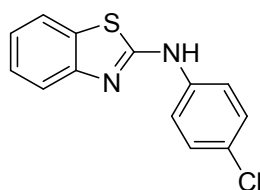

**N-(4-chlorophenyl)benzo[d]thiazol-2-amine(2d):**<sup>1</sup> The product was purified by flash chromatography to give 76 mg (82%) as a yellow solid. <sup>1</sup>H NMR (DMSO-*D*<sub>6</sub>, 500 MHz)  $\delta$  = 10.62 (s, 1H), 7.84-7.81 (m, 3H), 7.62 (d,  $J$  = 7.5 Hz, 1H), 7.41 (d,  $J$  = 9.0 Hz, 2H), 7.34 (td,  $J$  = 8.0 Hz, 1.0 Hz, 1H), 7.16 (td,  $J$  = 8.0 Hz, 1.0 Hz, 1H). <sup>13</sup>C NMR (DMSO-*D*<sub>6</sub>, 125 MHz)  $\delta$  = 161.8, 152.4, 140.0, 130.5, 129.3, 126.5, 126.0, 123.0, 121.6, 119.9, 119.7.

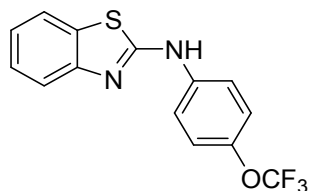

**N-(4-(trifluoromethoxy)phenyl)benzo[d]thiazol-2-amine(2e):** The product was purified by flash chromatography to give 72 mg (82%) as a yellow solid. mp: 168.7-170.0 °C. <sup>1</sup>H NMR (DMSO-*D*<sub>6</sub>, 500 MHz)  $\delta$  = 10.68 (s, 1H), 7.94-7.91 (m, 2H), 7.80 (dd,  $J$  = 8.0 Hz, 1.0 Hz, 1H), 7.63 (d,  $J$  = 7.5 Hz, 1H), 7.36-7.31 (m, 3H), 7.16 (td,  $J$  = 8.0 Hz, 1.0 Hz, 1H). <sup>13</sup>C NMR (DMSO-*D*<sub>6</sub>, 125 MHz)  $\delta$  = 161.9, 152.4, 143.2, 140.3, 130.6, 126.4, 123.0, 122.3, 121.5, 120.7 (q,  $J$  = 254 Hz), 119.9, 119.4. HRMS (ESI,  $m/z$ ) calcd for [C<sub>14</sub>H<sub>10</sub>F<sub>3</sub>N<sub>2</sub>OS]<sup>+</sup>: 311.0460; found 311.0462.

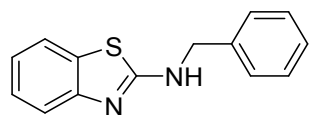

**N-benzylbenzo[d]thiazol-2-amine(2f):**<sup>5</sup> The product was purified by flash chromatography to give 61 mg (95%) as a yellow solid. <sup>1</sup>H NMR (DMSO-*D*<sub>6</sub>, 500 MHz)  $\delta$  = 8.53 (s, 1H), 7.67 (d,  $J$  = 7.5 Hz,

1H), 7.41 (t,  $J = 8.5$  Hz, 3H), 7.34 (t,  $J = 7.5$  Hz, 2H), 7.27-7.21 (m, 2H), 7.02 (td,  $J = 7.5$  Hz, 0.5 Hz, 1H), 4.62 (d,  $J = 5.0$  Hz, 2H).  $^{13}\text{C}$  NMR (DMSO- $\text{D}_6$ , 125 MHz)  $\delta = 166.8, 153.0, 139.4, 131.0, 128.8, 127.9, 127.5, 126.0, 121.5, 121.4, 118.6, 47.7$ .

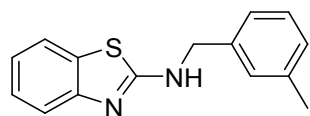

**N-(3-methylbenzyl)benzo[d]thiazol-2-amine(2g):**<sup>7</sup> The product was purified by flash chromatography to give 73 mg (91%) as a yellow solid.  $^1\text{H}$  NMR (DMSO- $\text{D}_6$ , 500 MHz)  $\delta = 8.53$  (s, 1H), 7.66 (d,  $J = 7.5$  Hz, 1H), 7.41 (d,  $J = 8.0$  Hz, 1H), 7.23-7.16 (m, 4H), 7.07-7.00 (m, 2H), 4.57 (d,  $J = 5.0$  Hz, 2H), 2.27 (s, 3H).  $^{13}\text{C}$  NMR (DMSO- $\text{D}_6$ , 125 MHz)  $\delta = 166.9, 153.1, 139.4, 138.1, 131.0, 129.0, 128.6, 128.3, 126.2, 125.1, 121.6, 121.6, 118.7, 47.9, 21.7$ .

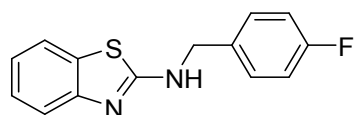

**N-(4-fluorobenzyl)benzo[d]thiazol-2-amine(2h):**<sup>7</sup> The product was purified by flash chromatography to give 63 mg (84%) as a yellow solid.  $^1\text{H}$  NMR (DMSO- $\text{D}_6$ , 500 MHz)  $\delta = 8.52$  (s, 1H), 7.66 (dd,  $J = 8.0$  Hz, 1.0 Hz, 1H), 7.44-7.40 (m, 3H), 7.22 (td,  $J = 7.5$  Hz, 1.5 Hz, 1H), 7.16 (td,  $J = 6.5$  Hz, 2.0 Hz, 2H), 7.02 (td,  $J = 7.5$  Hz, 1.0 Hz, 1H), 4.59 (d,  $J = 5.0$  Hz, 2H).  $^{13}\text{C}$  NMR (DMSO- $\text{D}_6$ , 125 MHz)  $\delta = 166.7, 161.8$  (d,  $J = 241.3$  Hz), 152.9, 135.6 (d,  $J = 3.0$  Hz), 130.9, 129.9 (d,  $J = 8.1$  Hz), 126.0, 121.5, 121.4, 118.6, 115.5 (d,  $J = 21.3$  Hz), 47.0.

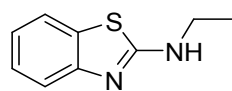

**N-ethylbenzo[d]thiazol-2-amine(2i):**<sup>3</sup> The product was purified by flash chromatography to give 44 mg (90%) as a yellow solid.  $^1\text{H}$  NMR (DMSO- $\text{D}_6$ , 500 MHz)  $\delta = 7.98$  (s, 1H), 7.64 (dd,  $J = 7.5$  Hz, 1.0 Hz, 1H), 7.38 (d,  $J = 7.5$  Hz, 1H), 7.20 (td,  $J = 8.0$  Hz, 1.5 Hz, 1H), 7.00 (td,  $J = 8.0$  Hz, 1.0 Hz, 1H), 3.40-3.36 (m, 2H), 1.19 (t,  $J = 7.0$  Hz, 3H).  $^{13}\text{C}$  NMR (DMSO- $\text{D}_6$ , 125 MHz)  $\delta = 166.5, 153.2, 130.7, 126.0, 121.3, 121.2, 118.4, 39.2, 14.9$ .

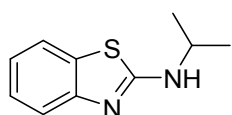

**N-isopropylbenzo[d]thiazol-2-amine(2j):**<sup>4</sup> The product was purified by flash chromatography to give 52 mg (87%) as a

yellow solid.  $^1\text{H}$  NMR (DMSO- $\text{D}_6$ , 500 MHz)  $\delta$  = 7.90 (s, 1H), 7.63 (d,  $J$  = 7.5 Hz, 1H), 7.38 (d,  $J$  = 8.0 Hz, 1H), 7.20 (t,  $J$  = 7.5 Hz, 1H), 7.00 (t,  $J$  = 7.5 Hz, 1H), 4.02-3.96 (m, 1H), 1.21 (d,  $J$  = 6.5 Hz, 6H).  $^{13}\text{C}$  NMR (DMSO- $\text{D}_6$ , 125 MHz)  $\delta$  = 165.8, 153.3, 130.7, 125.9, 121.2, 121.2, 118.4, 46.3, 22.8.

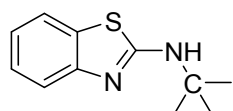

**2-(tert-butyl)benzo[d]thiazole(2k):**<sup>5</sup> The product was purified by flash chromatography to give 57 mg (93%) as a yellow solid.  $^1\text{H}$  NMR ( $\text{CDCl}_3$ , 500 MHz)  $\delta$  = 7.55 (t,  $J$  = 7.8 Hz, 2H), 7.28-7.23 (m, 1H), 7.05 (t,  $J$  = 7.5 Hz, 1H), 5.41 (s, 1H), 1.47 (s, 9H).  $^{13}\text{C}$  NMR ( $\text{CDCl}_3$ , 125 MHz)  $\delta$  = 164.6, 152.3, 130.7, 125.6, 121.4, 120.3, 119.0, 53.2, 29.0.

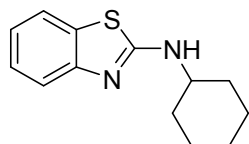

**N-cyclohexylbenzo[d]thiazol-2-amine(2l):**<sup>5</sup> The product was purified by flash chromatography to give 63 mg (92%) as a yellow solid.  $^1\text{H}$  NMR (DMSO- $\text{D}_6$ , 500 MHz)  $\delta$  = 7.92 (s, 1H), 7.18 (dd,  $J$  = 7.5 Hz, 1.0 Hz, 1H), 7.72 (dd,  $J$  = 8.0 Hz, 0.5 Hz, 1H), 7.19 (td,  $J$  = 8.0 Hz, 1.0 Hz, 1H), 6.98 (td,  $J$  = 7.5 Hz, 1.0 Hz, 1H), 3.70 (t,  $J$  = 3.3 Hz, 1H), 1.99 (d,  $J$  = 7 Hz, 2H), 1.73-1.70 (m, 2H), 1.58-1.55 (m, 1H), 1.34-1.25 (m, 4H), 1.20-1.15 (m, 1H).  $^{13}\text{C}$  NMR (DMSO- $\text{D}_6$ , 125 MHz)  $\delta$  = 165.6, 153.2, 130.6, 125.8, 121.1, 121.1, 118.3, 53.3, 32.8, 25.7, 24.9.

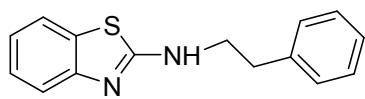

**N-phenethylbenzo[d]thiazol-2-amine(2m):**<sup>4</sup> The product was purified by flash chromatography to give 68 mg (77%) as a yellow solid.  $^1\text{H}$  NMR (DMSO- $\text{D}_6$ , 500 MHz)  $\delta$  = 8.12 (s, 1H), 7.65 (dd,  $J$  = 8.0 Hz, 1.0 Hz, 1H), 7.43 (dd,  $J$  = 8.0 Hz, 0.5 Hz, 1H), 7.31-7.26 (m, 4H), 7.24-7.20 (m, 2H), 7.01 (td,  $J$  = 8.0 Hz, 1.0 Hz, 1H), 3.64-3.60 (m, 2H), 2.93 (t,  $J$  = 7.3 Hz, 2H).  $^{13}\text{C}$  NMR (DMSO- $\text{D}_6$ , 125 MHz)  $\delta$  = 166.5, 153.2, 139.8, 130.8, 129.2, 128.8, 126.6, 126.0, 121.4, 118.5(2C), 45.9, 35.2.

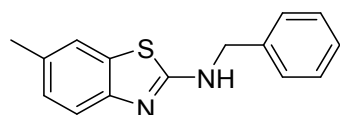

**N-benzyl-6-methylbenzo[d]thiazol-2-amine(2n):**<sup>6</sup> The product was purified by flash chromatography to give 65

mg (85%) as a yellow solid.  $^1\text{H}$  NMR (DMSO- $\text{D}_6$ , 500 MHz)  $\delta$  = 8.38 (s, 1H), 7.45 (s, 1H), 7.38 (d,  $J$  = 7.0 Hz, 2H), 7.34 (t,  $J$  = 7.5 Hz, 2H), 7.28-7.24 (m, 2H), 7.02 (d,  $J$  = 8.0 Hz, 1H), 4.58 (d,  $J$  = 5.5 Hz, 2H), 2.30 (s, 3H).  $^{13}\text{C}$  NMR (DMSO- $\text{D}_6$ , 125 MHz)  $\delta$  = 166.1, 150.8, 139.5, 131.0, 130.7, 128.9, 127.9, 127.5, 127.1, 121.4, 118.3, 47.7, 21.3.

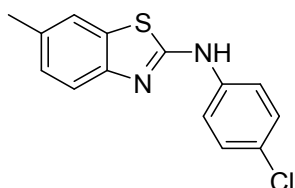

**N-(4-chlorophenyl)-6-methylbenzo[d]thiazol-2-**

**amine(2o):**<sup>1</sup> The product was purified by flash chromatography to give 79 mg (96%) as a yellow solid.  $^1\text{H}$  NMR (DMSO- $\text{D}_6$ , 500 MHz)  $\delta$  = 10.52 (s, 1H), 7.81 (d,  $J$  =

8.5 Hz, 2H), 7.60 (s, 1H), 7.50 (d,  $J$  = 8.5 Hz, 1H), 7.41-7.39 (m, 2H), 7.14 (dd,  $J$  = 8.0 Hz, 1.0 Hz, 1H), 2.34 (s, 3H).  $^{13}\text{C}$  NMR (DMSO- $\text{D}_6$ , 125 MHz)  $\delta$  = 160.8, 150.0, 139.9, 132.1, 130.3, 129.0, 127.3, 125.6, 121.2, 119.4, 119.3, 21.1.

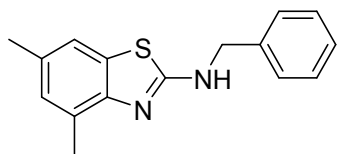

**N-benzyl-4,6-dimethylbenzo[d]thiazol-2-amine(2p):**<sup>7</sup>

The product was purified by flash chromatography to give 70 mg (87%) as a yellow solid.  $^1\text{H}$  NMR (DMSO- $\text{D}_6$ , 500 MHz)  $\delta$  = 8.37 (s, 1H), 7.40 (d,  $J$  = 7.5 Hz, 2H), 7.33 (t,  $J$  = 7.8 Hz, 2H), 7.25 (t,  $J$  = 5.0 Hz, 2H), 6.85 (s, 1H), 4.57 (d,  $J$  = 5.0 Hz, 2H), 2.41 (s, 3H), 2.26 (s, 3H).  $^{13}\text{C}$  NMR (DMSO- $\text{D}_6$ , 125 MHz)  $\delta$  = 165.5, 149.8, 139.6, 130.5, 130.4, 128.8, 128.2, 128.0, 127.6, 127.4, 118.8, 48.0, 21.3, 18.6.

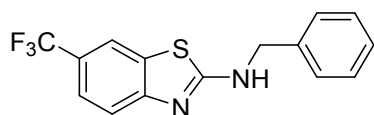

**N-benzyl-6-(trifluoromethyl)benzo[d]thiazol-2-amine(2q):**

The product was purified by flash chromatography to give 83 mg (89%) as a yellow solid. mp: 192.5-194.7 °C.  $^1\text{H}$  NMR (DMSO- $\text{D}_6$ , 500 MHz)  $\delta$  = 8.88 (s, 1H), 8.11 (s, 1H), 7.52 (s, 2H), 7.40-7.33 (m, 4H), 7.26 (t,  $J$  = 7.0 Hz, 1H), 4.65 (d,  $J$  = 5.0 Hz, 2H).  $^{13}\text{C}$  NMR (DMSO- $\text{D}_6$ , 125 MHz)  $\delta$  = 169.4, 156.0, 139.0, 131.6, 129.0, 128.0, 127.7, 125.3 (q,  $J$  = 269.5 Hz), 123.2 (q,  $J$  = 3.6 Hz), 121.7 (q,  $J$  = 31.6 Hz), 119.1 (q,  $J$  = 3.8 Hz), 118.4, 47.9. HRMS (ESI,  $m/z$ ) calcd for  $[\text{C}_{15}\text{H}_{12}\text{F}_3\text{N}_2\text{S}]^+\text{H}^+$ : 309.0668; found 309.0666.

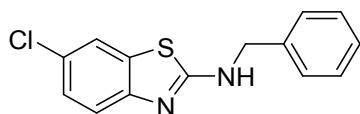

**N-benzyl-6-chlorobenzo[d]thiazol-2-amine(2r):**<sup>7</sup> The product was purified by flash chromatography to give 75 mg (90%) as a yellow solid. <sup>1</sup>H NMR (DMSO-D<sub>6</sub>, 500 MHz)  $\delta$  = 8.60 (s, 1H), 7.78 (d,  $J$  = 2.0 Hz, 1H), 7.38-7.32 (m, 5H), 7.27-7.21 (m, 2H), 4.59 (d,  $J$  = 5.5 Hz, 2H). <sup>13</sup>C NMR (DMSO-D<sub>6</sub>, 125 MHz)  $\delta$  = 167.4, 151.9, 139.2, 132.6, 128.9, 127.9, 127.6, 126.2, 125.2, 121.1, 119.4, 47.8.

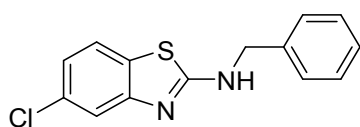

**N-benzyl-5-chlorobenzo[d]thiazol-2-amine(2s):**<sup>6</sup> The product was purified by flash chromatography to give 75 mg (92%) as a yellow solid. <sup>1</sup>H NMR (DMSO-D<sub>6</sub>, 500 MHz)  $\delta$  = 8.72 (s, 1H), 7.67 (d,  $J$  = 8.0 Hz, 1H), 7.42 (s, 1H), 7.39-7.32 (m, 4H), 7.26 (td,  $J$  = 8.0 Hz, 1.5 Hz, 1H), 7.04 (dd,  $J$  = 8.5 Hz, 2.0 Hz, 1H), 4.61 (d,  $J$  = 5.5 Hz, 2H). <sup>13</sup>C NMR (DMSO-D<sub>6</sub>, 125 MHz)  $\delta$  = 168.4, 154.2, 139.1, 130.8, 129.7, 128.9, 127.9, 127.6, 122.7, 121.2, 118.0, 47.8.

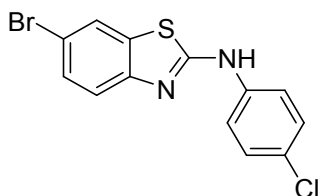

**6-bromo-N-(4-chlorophenyl)benzo[d]thiazol-2-amine(2t):**<sup>2</sup> The product was purified by flash chromatography to give 68 mg (66%) as a yellow solid. <sup>1</sup>H NMR (DMSO-D<sub>6</sub>, 500 MHz)  $\delta$  = 10.70 (s, 1H), 8.06 (d,  $J$  = 2.0 Hz, 1H), 7.80 (d,  $J$  = 8.5 Hz, 2H), 7.53 (d,  $J$  = 8.5 Hz, 1H), 7.45 (dd,  $J$  = 8.5 Hz, 2.0 Hz, 1H), 7.41 (d,  $J$  = 8.5 Hz, 2H). <sup>13</sup>C NMR (DMSO-D<sub>6</sub>, 125 MHz)  $\delta$  = 162.5, 151.6, 139.7, 132.7, 129.3(2C), 126.3, 124.1, 121.3, 119.9, 114.5.



## 5) References

1. W. Zhang, Y. Yue, D. Yu, L. Song, Y. Y. Xu, Y. J. Tian, and Y. J. Guo, *Adv. Synth. Catal.*, 2012, **354**, 2283.
2. G. Shen, X. Lv, and W. Bao, *Eur. J. Org. Chem.*, 2009, 5897.
3. Q. Ding, X. He and J. Wu, *J. Comb. Chem.*, 2009, **11**, 587.
4. S. Toulot, T. Heinrich, and F. R. Leroux, *Adv. Synth. Catal.*, 2013, **355**, 3263.
5. T. H. Zhu, S. Y. Wang, G. N. Wang, and S. J. Ji, *Chem. Eur. J.*, 2013, **19**, 5850.
6. X. Zhang, X. Jia, J. Wang and X. Fan, *Green Chem.*, 2011, **13**, 413.
7. F. Li, H. Shan, Q. Kang and L. Chen, *Chem. Commun.*, 2011, **47**, 5058.
8. S. K. Rout, S. Guin, J. Nath and B. K. Patel, *Green Chem.*, 2012, **14**, 2491.

## 6) Scanned $^1\text{H}$ NMR and $^{13}\text{C}$ NMR Spectra of All New Compounds

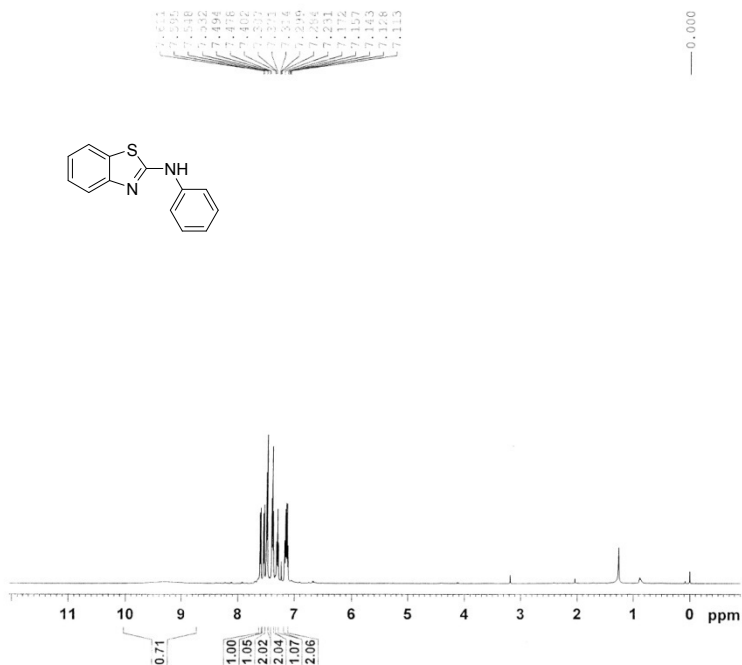

0.000

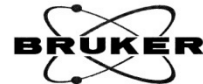

h-308

```

NAME zengweilan20130702
EXPNO 3
PROCNO 1
Date_ 20130702
Time 16.06
INSTRUM spect
PROBHD 5 mm PABBO BB-
PULPROG zg30
TD 65536
SOLVENT CDCl3
NS 16
DS 2
SWH 10330.578 Hz
FIDRES 0.157632 Hz
AQ 3.1719923 sec
RG 203
DW 48.400 usec
DE 6.50 usec
TE 301.2 K
D1 1.00000000 sec
TDO 1
    
```

```

===== CHANNEL f1 =====
NUC1 1H
P1 14.60 usec
PL1 2.00 dB
PL1W 9.9058243 W
SFO1 500.1330885 MHz
SI 32768
SF 500.1300268 MHz
WDW no
SSB 0
LB 0.00 Hz
GB 0
PC 1.00
    
```

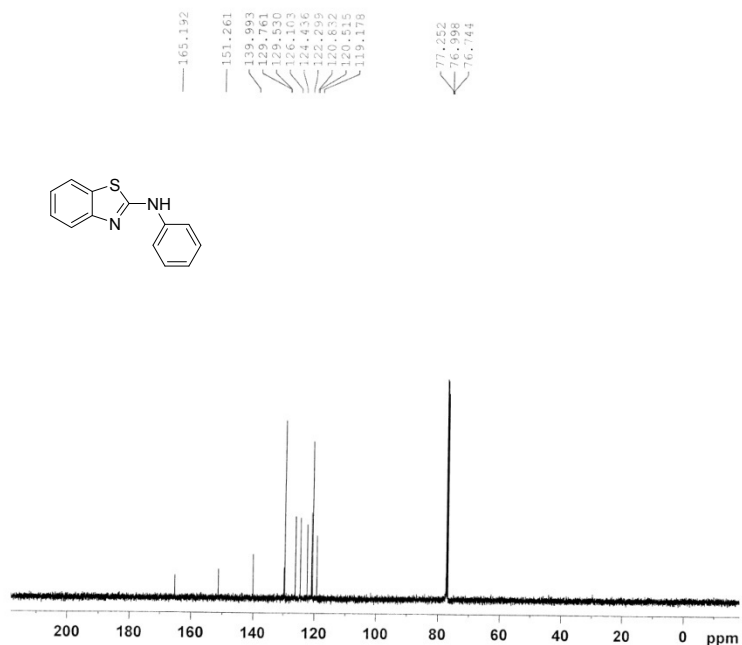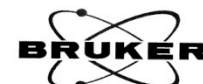

C-308

```

NAME zengweilan20130702
EXPNO 4
PROCNO 1
Date_ 20130702
Time 16.01
INSTRUM spect
PROBHD 5 mm PABBO BB-
PULPROG zgpg30
TD 65536
SOLVENT CDCl3
NS 77
DS 4
SWH 29761.904 Hz
FIDRES 0.454131 Hz
AQ 1.1010548 sec
RG 2050
DW 16.800 usec
DE 6.50 usec
TE 301.6 K
D1 2.00000000 sec
D11 0.03000000 sec
TDO 1
    
```

```

===== CHANNEL f1 =====
NUC1 13C
P1 9.80 usec
PL1 2.80 dB
PL1W 52.46661758 W
SFO1 125.7703643 MHz

===== CHANNEL f2 =====
CPDPRG2 waltz16
NUC2 1H
PCPD2 80.00 usec
PL2 2.00 dB
PL12 16.89 dB
PL13 16.70 dB
PL2W 9.9058243 W
PL12W 0.33127732 W
PL13W 0.33564481 W
SFO2 500.1320005 MHz
SI 32768
SF 125.7577959 MHz
WDW EM
SSB 0
LB 1.00 Hz
GB 0
PC 1.40
    
```

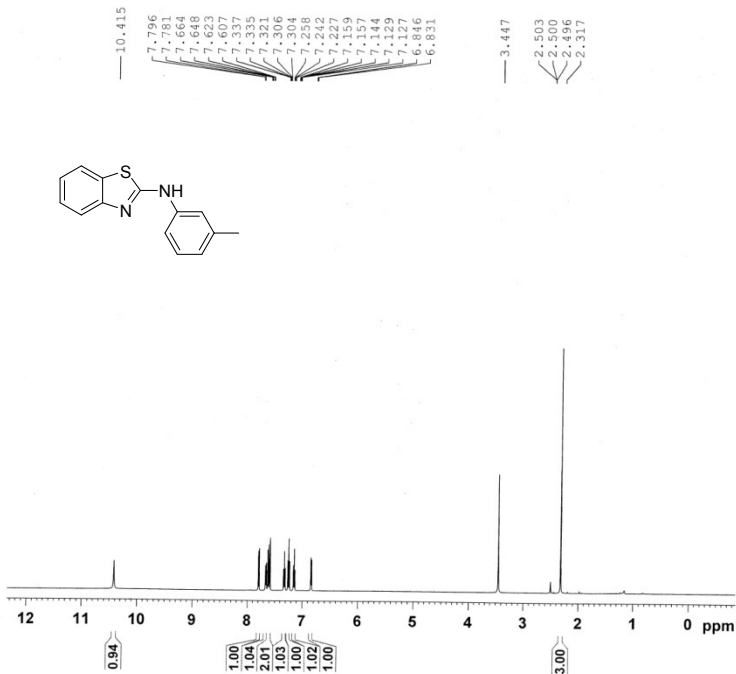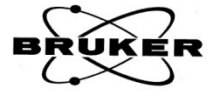

384  
 NAME zengweilan20131005  
 EXPNO 3  
 PROCNO 1  
 Date 20131005  
 Time 11.05  
 INSTRUM spect  
 PROBHD 5 mm PABBO BB-  
 PULPROG zg30  
 TD 65536  
 SOLVENT DMSO  
 NS 16  
 DS 2  
 SWH 10330.578 Hz  
 FIDRES 0.157632 Hz  
 AQ 3.1719923 sec  
 RG 45.2  
 DW 48.400 usec  
 DE 6.50 usec  
 TE 268.8 K  
 D1 1.00000000 sec  
 TDO 1

----- CHANNEL f1 -----  
 NUC1 1H  
 P1 14.00 usec  
 PL1 1.00 dB  
 PL1W 12.47038937 W  
 SFO1 500.130885 MHz  
 SI 32768  
 SF 500.1300035 MHz  
 WDW no  
 SSB 0  
 LB 0.00 Hz  
 GB 0  
 PC 1.00

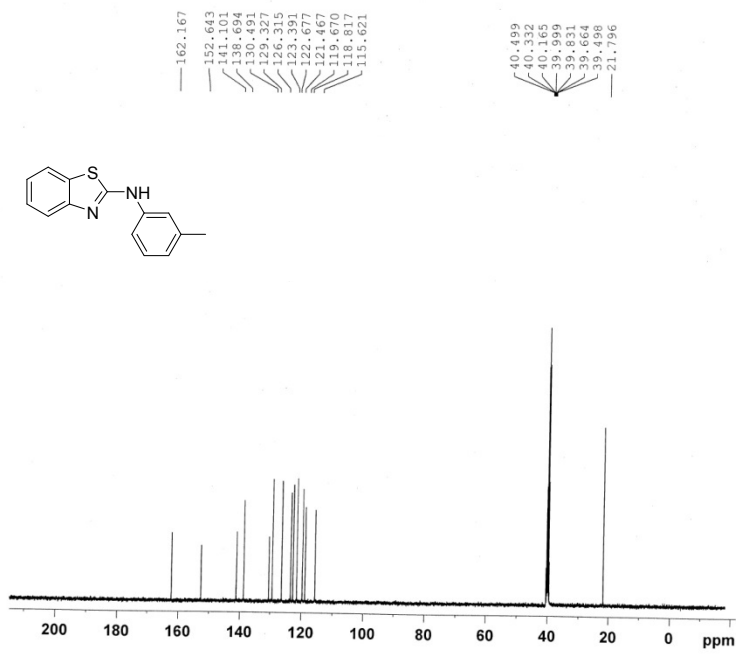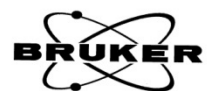

384  
 NAME zengweilan20131005  
 EXPNO 4  
 PROCNO 1  
 Date 20131005  
 Time 11.08  
 INSTRUM spect  
 PROBHD 5 mm PABBO BB-  
 PULPROG zgpg30  
 TD 65536  
 SOLVENT DMSO  
 NS 127  
 ES 4  
 SWH 29761.904 Hz  
 FIDRES 0.454131 Hz  
 AQ 1.1010548 sec  
 RG 2050  
 DW 16.800 usec  
 DE 6.50 usec  
 TE 269.7 K  
 D1 2.00000000 sec  
 D11 0.03000000 sec  
 TDO 1

----- CHANNEL f1 -----  
 NUC1 13C  
 P1 9.00 usec  
 PL1 1.00 dB  
 PL1W 79.41143799 W  
 SFO1 125.7703643 MHz

----- CHANNEL f2 -----  
 CPDPRG2 waltz16  
 NUC2 1H  
 PCPD2 80.00 usec  
 PL2 1.00 dB  
 PL12 16.14 dB  
 PL13 16.14 dB  
 PL2W 12.47038937 W  
 PL2W 0.38183883 W  
 PL12W 0.38183883 W  
 SFO2 500.1320005 MHz  
 SI 32768  
 SF 125.7577966 MHz  
 WDW EM  
 SSB 0  
 LB 1.00 Hz  
 GB 0  
 PC 1.40

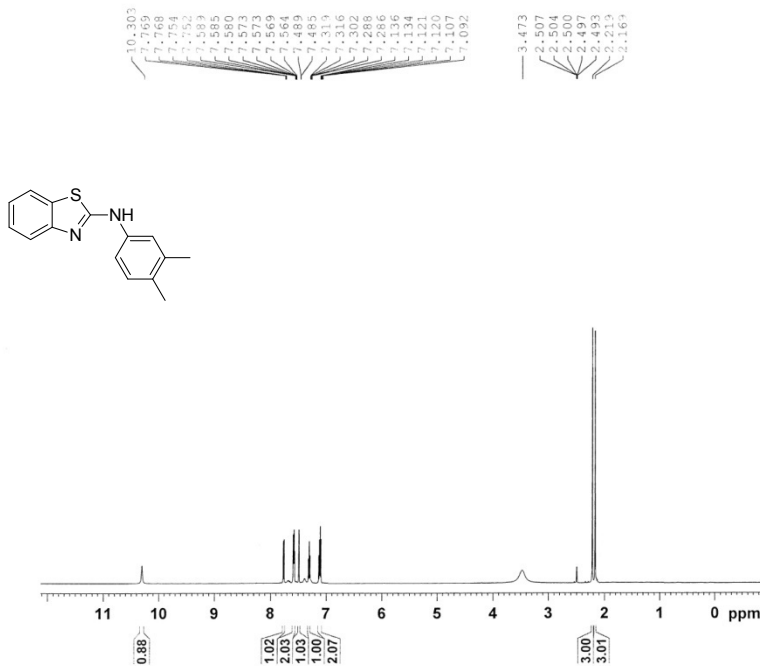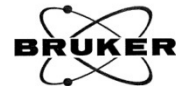

403

NAME zengweilan20131013  
 EXPNO 6  
 PROCNO 1  
 Date 20131013  
 Time 16.12  
 INSTRUM spect  
 FROBHD 5 mm PABBO BB-  
 PULPROG zg30  
 TD 65536  
 SOLVENT DMSO  
 NS 16  
 DS 2  
 SWH 10330.578 Hz  
 FIDRES 0.157632 Hz  
 AQ 3.1719923 sec  
 RG 40.3  
 DW 48.400 usec  
 DE 6.50 usec  
 TE 268.7 K  
 D1 1.00000000 sec  
 TDO 1

===== CHANNEL f1 =====  
 NUC1 1H  
 P1 14.00 usec  
 PL1 1.00 dB  
 PL1W 12.47038937 W  
 SFO1 500.130885 MHz  
 SI 32768  
 SF 500.1300030 MHz  
 WDW no  
 SSB 0  
 LB 0.00 Hz  
 GB 0  
 PC 1.00

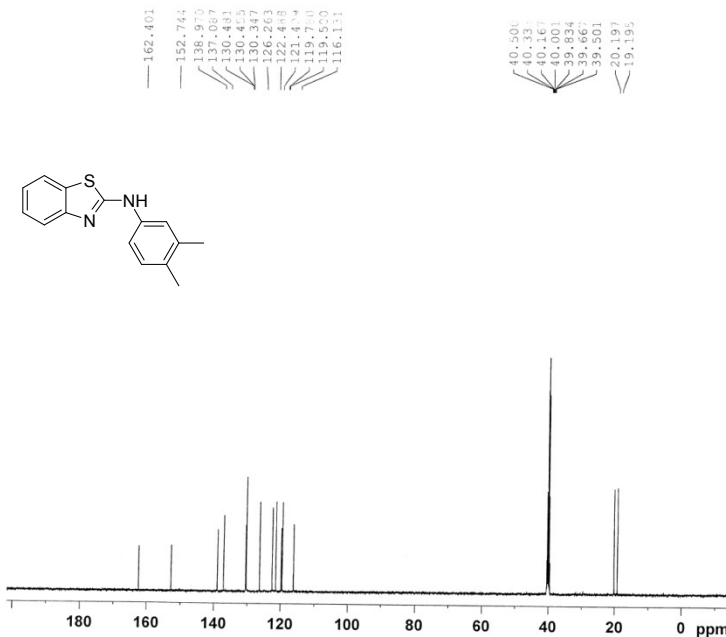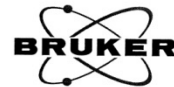

403

NAME zengweilan20131013  
 EXPNO 2  
 PROCNO 1  
 Date 20131013  
 Time 16.40  
 INSTRUM spect  
 FROBHD 5 mm PABBO BB-  
 PULPROG zgpg30  
 TD 65536  
 SOLVENT DMSO  
 NS 150  
 DS 4  
 SWH 29761.904 Hz  
 FIDRES 0.454131 Hz  
 AQ 1.1010548 sec  
 RG 2050  
 DW 16.800 usec  
 DE 6.50 usec  
 TE 271.1 K  
 D1 2.00000000 sec  
 D11 0.03000000 sec  
 TDO 1

===== CHANNEL f1 =====  
 NUC1 13C  
 P1 9.00 usec  
 PL1 1.00 dB  
 PL1W 79.41143799 W  
 SFO1 125.7703643 MHz

===== CHANNEL f2 =====  
 CPDPRG2 waltz16  
 NUC2 1H  
 PCPD2 80.00 usec  
 PL2 1.00 dB  
 PL12 16.14 dB  
 PL13 16.14 dB  
 PL2W 12.47038937 W  
 PL12W 0.38183883 W  
 PL13W 0.38183883 W  
 SFO2 500.1320005 MHz  
 SI 32768  
 SF 125.7577958 MHz  
 WDW EM  
 SSB 0  
 GB 0

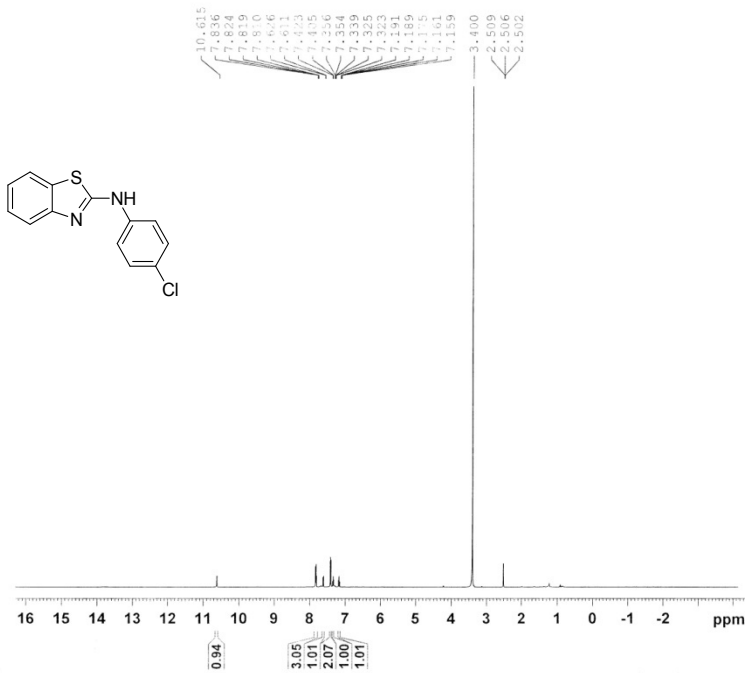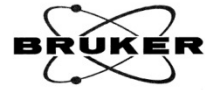

H-340  
 NAME zengweilan20130827  
 EXPNO 1  
 PROCNO 1  
 Date\_ 20130827  
 Time 15.31  
 INSTRUM spect  
 PROBHD 5 mm PABBO BB-  
 PULPROG zg30  
 TD 65536  
 SOLVENT DMSO  
 NS 16  
 DS 2  
 SWH 10330.578 Hz  
 FIDRES 0.157632 Hz  
 AQ 3.1719923 sec  
 RG 191  
 DW 48.400 usec  
 DE 6.50 usec  
 TE 268.7 K  
 D1 1.0000000 sec  
 TDO 1

===== CHANNEL f1 =====  
 NUC1 1H  
 P1 14.00 usec  
 PL1 1.00 dB  
 PL1W 12.47038937 W  
 SFO1 500.1330885 MHz  
 SI 32768  
 SF 500.1300010 MHz  
 WDW no  
 SSB 0  
 LB 0.00 Hz  
 GB 0  
 PC 1.00

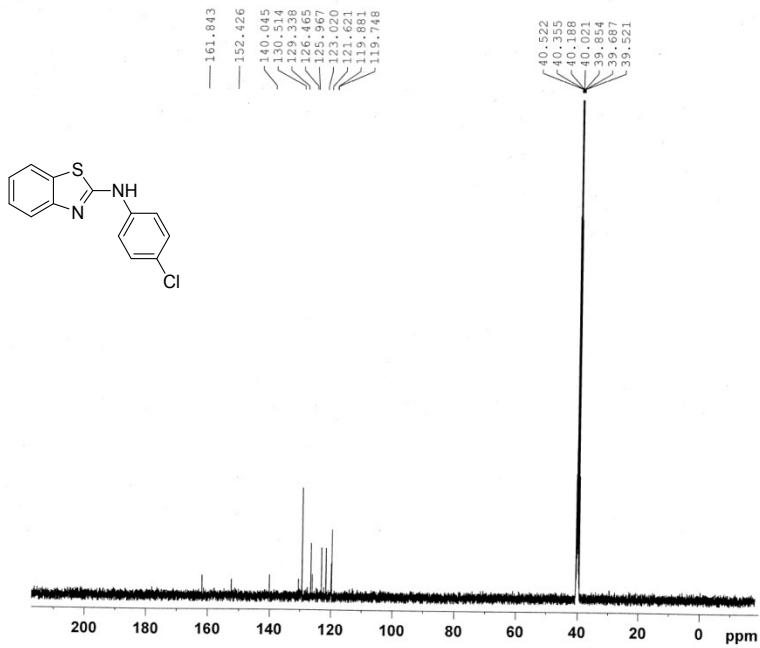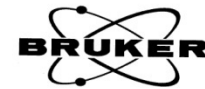

C-340  
 NAME zengweilan20130827  
 EXPNO 2  
 PROCNO 1  
 Date\_ 20130827  
 Time 15.35  
 INSTRUM spect  
 PROBHD 5 mm PABBO BB-  
 PULPROG zgpg30  
 TD 65536  
 SOLVENT DMSO  
 NS 205  
 DS 4  
 SWH 29761.904 Hz  
 FIDRES 0.454131 Hz  
 AQ 1.1010548 sec  
 RG 2050  
 DW 16.800 usec  
 DE 6.50 usec  
 TE 270.9 K  
 D1 2.0000000 sec  
 D11 0.0300000 sec  
 TDO 1

===== CHANNEL f1 =====  
 NUC1 13C  
 P1 9.00 usec  
 PL1 1.00 dB  
 PL1W 79.41143799 W  
 SFO1 125.7703643 MHz

===== CHANNEL f2 =====  
 CPDPRG2 waltz16  
 NUC2 1H  
 PCPD2 80.00 usec  
 PL2 1.00 dB  
 PL12 16.14 dB  
 PL13 16.14 dB  
 PL2W 12.47038937 W  
 PL12W 0.38183883 W  
 PL13W 0.38183883 W  
 SFO2 500.1320005 MHz  
 SI 32768  
 SF 125.7577832 MHz  
 WDW EM  
 SSB 0  
 LB 1.00 Hz  
 GB 0  
 PC 1.40

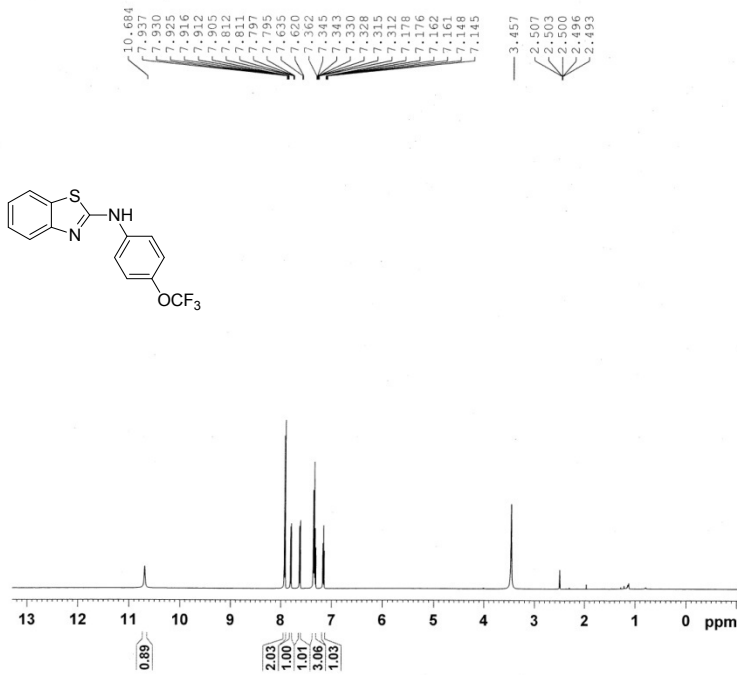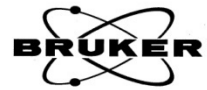

389  
 NAME zengweilan20131005  
 EXPNO 7  
 PROCNO 1  
 Date 20131005  
 Time 11.31  
 INSTRUM spect  
 PROBHD 5 mm PABBO BB-  
 PULPROG zg30  
 TD 65536  
 SOLVENT DMSO  
 NS 16  
 DS 2  
 SWH 10330.578 Hz  
 FIDRES 0.157632 Hz  
 AQ 3.171923 sec  
 RG 50.8  
 DW 48.400 usec  
 DE 6.50 usec  
 TE 268.7 K  
 D1 1.00000000 sec  
 TDO 1

===== CHANNEL f1 =====  
 NUC1 1H  
 P1 14.00 usec  
 PL1 1.00 dB  
 PL1W 12.47038937 W  
 SFO1 500.1330885 MHz  
 SI 32768  
 SF 500.1300038 MHz  
 WDW no  
 SSB 0  
 LB 0.00 Hz  
 GB 0  
 PC 1.00

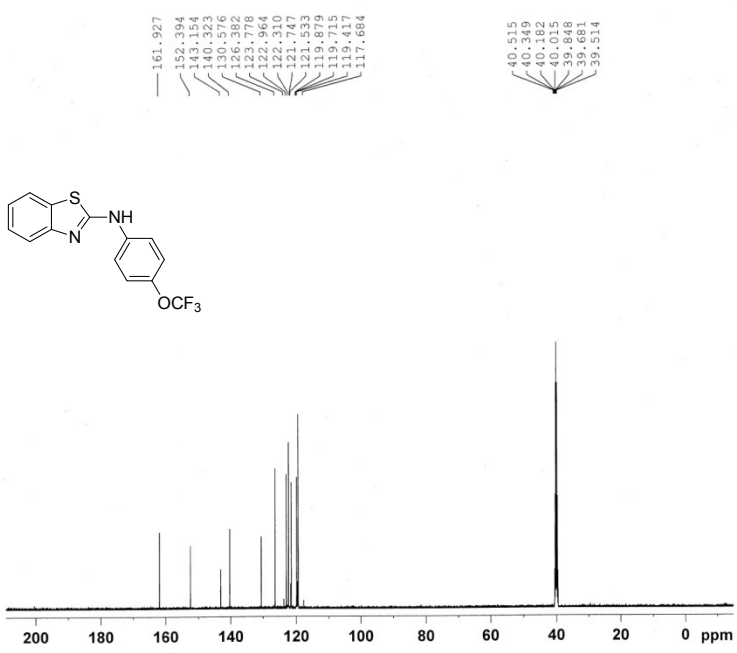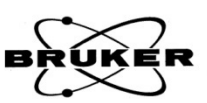

389  
 NAME zengweilan20131005  
 EXPNO 8  
 PROCNO 1  
 Date 20131005  
 Time 11.37  
 INSTRUM spect  
 PROBHD 5 mm PABBO BB-  
 PULPROG zgpg30  
 TD 65536  
 SOLVENT DMSO  
 NS 194  
 DS 4  
 SWH 29761.904 Hz  
 FIDRES 0.454131 Hz  
 AQ 1.1010548 sec  
 RG 2050  
 DW 16.800 usec  
 DE 6.50 usec  
 TE 270.6 K  
 D1 2.00000000 sec  
 D11 0.03000000 sec  
 TDO 1

===== CHANNEL f1 =====  
 NUC1 13C  
 P1 9.00 usec  
 PL1 1.00 dB  
 PL1W 79.41143799 W  
 SFO1 125.7703643 MHz  
 ===== CHANNEL f2 =====  
 CPDPRG2 waltz16  
 NUC2 1H  
 PCPD2 80.00 usec  
 PL2 1.00 dB  
 PL12 16.14 dB  
 PL13 16.14 dB  
 PL2W 12.47038937 W  
 PL12W 0.38183883 W  
 PL13W 0.38183883 W  
 SFO2 500.1320005 MHz  
 SI 32768  
 SF 125.7577849 MHz  
 WDW EM  
 SSB 0  
 LB 1.00 Hz  
 GB 0  
 PC 1.40

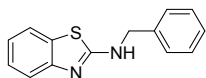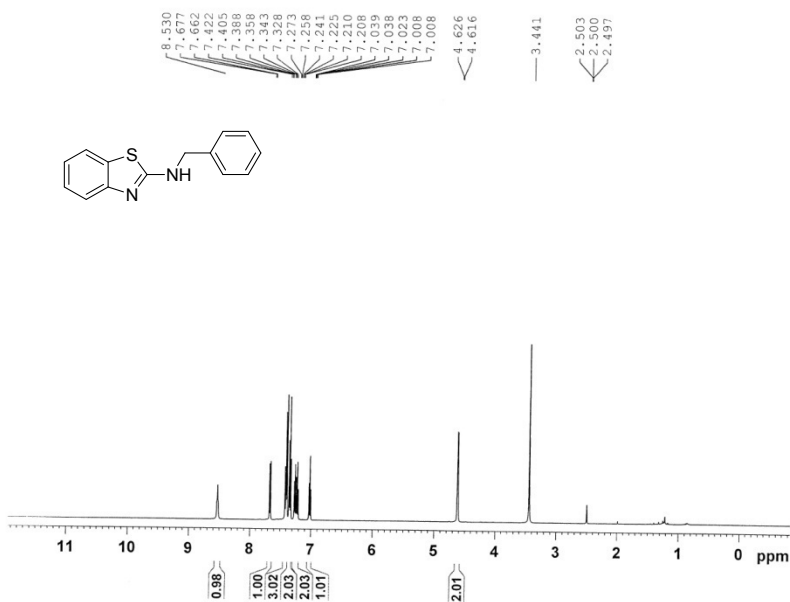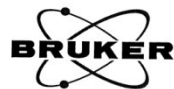

368

```

NAME zengweilan20130915
EXPNO 5
PROCNO 1
Date_ 20130915
Time 20.38
INSTRUM spect
PROBHD 5 mm PABBO BB-
PULPROG zg30
TD 65536
SOLVENT DMSO
NS 16
DS 2
SWH 10330.578 Hz
FIDRES 0.157632 Hz
AQ 3.1719923 sec
RG 50.8
DW 48.400 usec
DE 6.50 usec
TE 270.2 K
D1 1.00000000 sec
TDO 1

```

```

===== CHANNEL f1 =====
NUC1 1H
P1 14.00 usec
PL1 1.00 dB
PL1W 12.47038937 W
SFO1 500.1330885 MHz
SI 32768
SF 500.1300033 MHz
WDW rc
SSB 0
LB 0.00 Hz
GB 0
PC 1.00

```

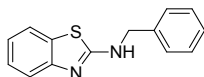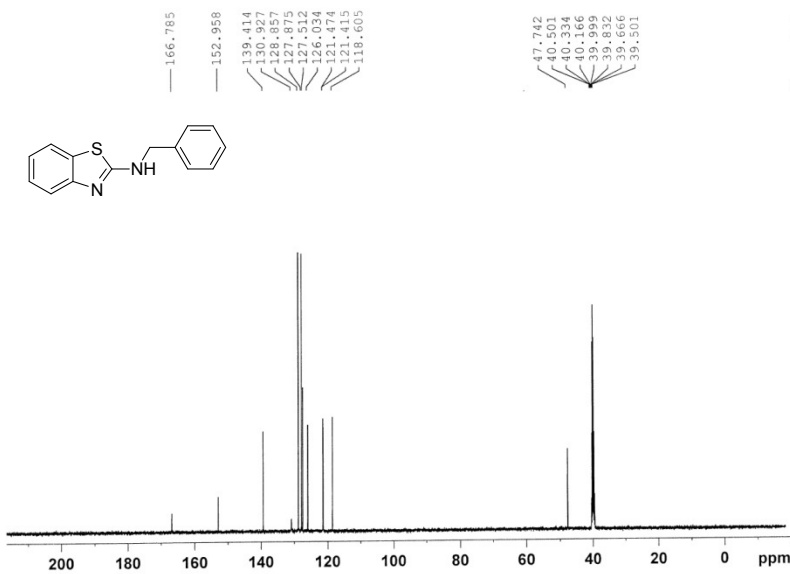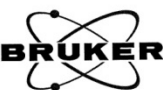

368

```

NAME zengweilan20130915
EXPNO 6
PROCNO 1
Date_ 20130915
Time 20.41
INSTRUM spect
PROBHD 5 mm PABBO BB-
PULPROG zgpg30
TD 65536
SOLVENT DMSO
NS 152
DS 4
SWH 29761.904 Hz
FIDRES 0.454131 Hz
AQ 1.1010548 sec
RG 2050
DW 16.800 usec
DE 6.50 usec
TE 271.1 K
D1 2.00000000 sec
D11 0.03000000 sec
TDO 1

```

```

===== CHANNEL f1 =====
NUC1 13C
P1 9.00 usec
PL1 1.00 dB
PL1W 79.41143798 W
SFO1 125.7703643 MHz

```

```

===== CHANNEL f2 =====
CPDPRG2 waltz16
NUC2 1H
PCPD2 80.00 usec
PL2 1.00 dB
PL12 16.14 dB
PL13 16.14 dB
PL2W 12.47038937 W
PL12W 0.38183883 W
PL13W 0.38183883 W
SFO2 500.1320005 MHz
SI 32768
SF 125.7577877 MHz
WDW EM
SSB 0
LB 1.00 Hz
GB 0
PC 1.40

```

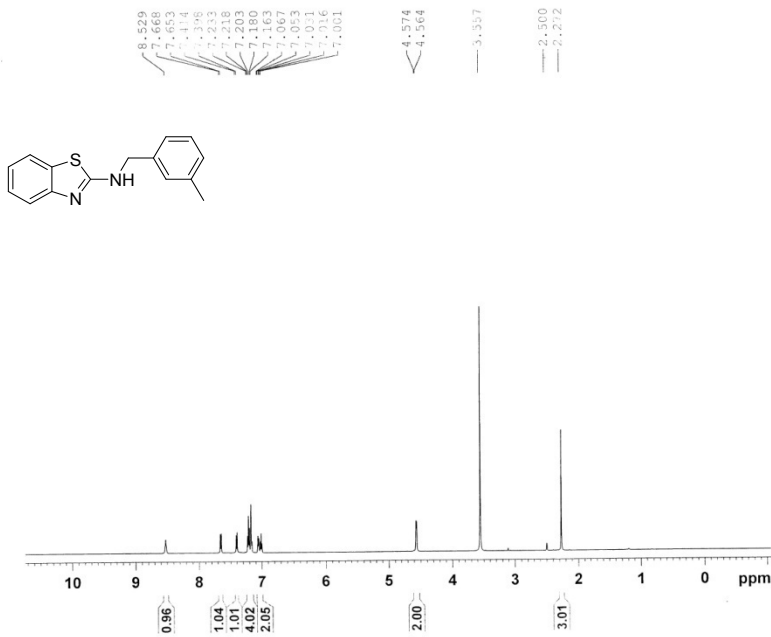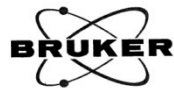

424  
 NAME zengweilan20131216  
 EXPNO 5  
 PROCNO 1  
 Date\_ 20131216  
 Time 19.13  
 INSTRUM spect  
 PROBHD 5 mm TXI 1H/D-  
 PULPROG zg30  
 TD 65536  
 SOLVENT DMSO  
 NS 16  
 DS 2  
 SWH 10330.578 Hz  
 FIDRES 0.157632 Hz  
 AQ 3.1719923 sec  
 RG 25.4  
 DW 48.400 usec  
 DE 6.50 usec  
 TE 673.2 K  
 D1 1.0000000 sec  
 TDO 1

----- CHANNEL f1 -----  
 NUC1 1H  
 P1 6.80 usec  
 PL1 0.80 dB  
 PL1W 13.05810070 W  
 SF01 500.1330885 MHz  
 SI 32768  
 SF 500.1300019 MHz  
 WDW no  
 SSB 0  
 LB 0.00 Hz  
 GB 0  
 FC 1.00

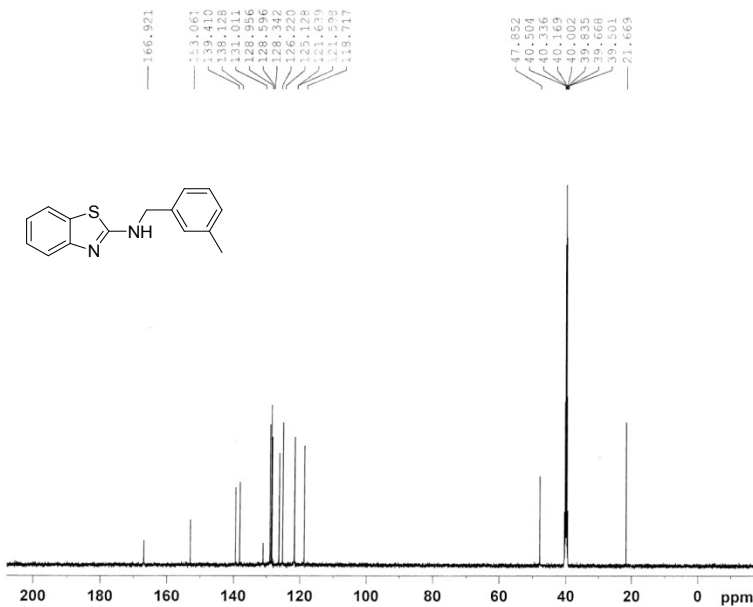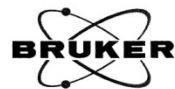

424  
 NAME zengweilan20131216  
 EXPNO 6  
 PROCNO 1  
 Date\_ 20131216  
 Time 19.18  
 INSTRUM spect  
 PROBHD 5 mm TXI 1H/D-  
 PULPROG zgpg30  
 TD 65536  
 SOLVENT DMSO  
 NS 165  
 DS 4  
 SWH 29761.904 Hz  
 FIDRES 0.454131 Hz  
 AQ 1.1010548 sec  
 RG 322  
 DW 16.800 usec  
 DE 6.50 usec  
 TE 673.2 K  
 D1 2.0000000 sec  
 D11 0.0300000 sec  
 TDO 1

----- CHANNEL f1 -----  
 NUC1 13C  
 P1 11.90 usec  
 PL1 -3.50 dB  
 PL1W 223.81184387 W  
 SF01 125.7703643 MHz

----- CHANNEL f2 -----  
 CPDPRG2 waltz16  
 NUC2 1H  
 ECPD2 80.00 usec  
 PL2 4.15 dB  
 PL12 22.13 dB  
 PL13 22.13 dB  
 PL2W 6.03781796 W  
 PL12W 0.09613468 W  
 PL13W 0.09613468 W  
 SF02 500.1320005 MHz  
 SI 32768  
 SF 125.7577677 MHz  
 WDW EM  
 SSB 0  
 LB 1.00 Hz  
 GB 0  
 FC 1.40



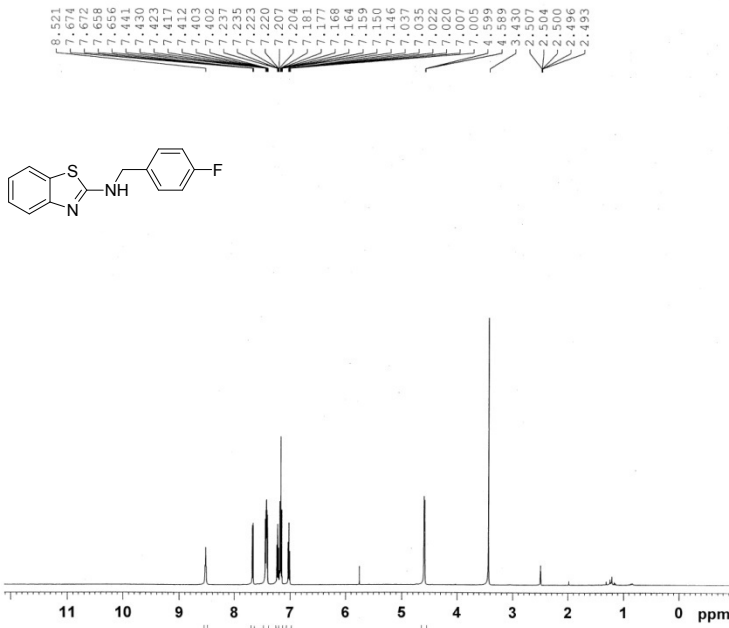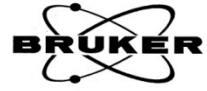

376  
 NAME zengweilan20130915  
 EXPNO 3  
 PROCNO 1  
 Date\_ 20130915  
 Time 20.26  
 INSTRUM spect  
 PROBHD 5 mm PABBO BB-  
 PULPROG zg30  
 TD 65536  
 SOLVENT DMSO  
 NS 16  
 DS 2  
 SWH 10330.578 Hz  
 FIDRES 0.157632 Hz  
 AQ 3.1719923 sec  
 RG 90.5  
 DW 48.400 usec  
 DE 6.50 usec  
 TE 269.9 K  
 D1 1.0000000 sec  
 TDO 1  
 ===== CHANNEL f1 =====  
 NUC1 1H  
 P1 14.00 usec  
 PL1 1.00 dB  
 PL1W 12.47038937 W  
 SFO1 500.1330885 MHz  
 SI 32768  
 SF 500.1300032 MHz  
 NDW no  
 SSB 0  
 LB 0.00 Hz  
 GB 0  
 PC 1.00

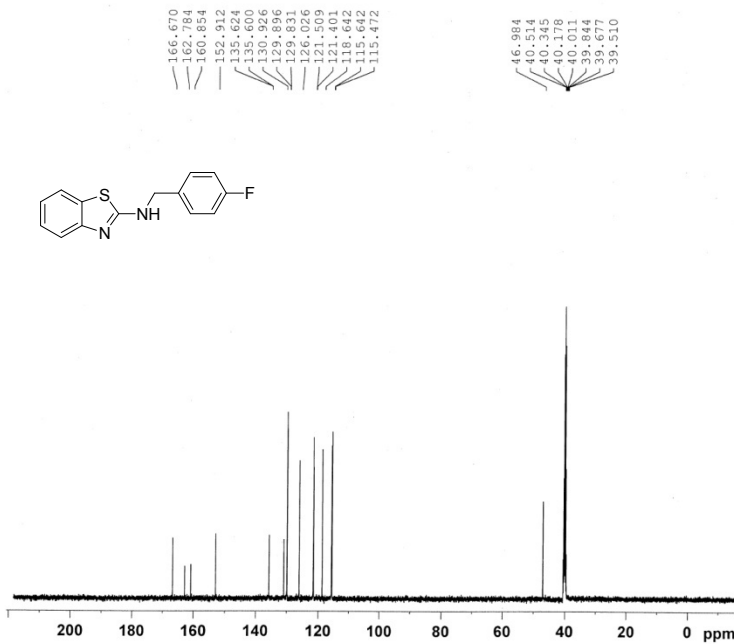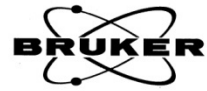

376  
 NAME zengweilan20130915  
 EXPNO 4  
 PROCNO 1  
 Date\_ 20130915  
 Time 20.31  
 INSTRUM spect  
 PROBHD 5 mm PABBO BB-  
 PULPROG zgpg30  
 TD 65536  
 SOLVENT DMSO  
 NS 138  
 DS 4  
 SWH 29761.904 Hz  
 FIDRES 0.454131 Hz  
 AQ 1.1010548 sec  
 RG 2050  
 DW 16.800 usec  
 DE 6.50 usec  
 TE 271.5 K  
 D1 2.0000000 sec  
 D11 0.0300000 sec  
 TDO 1  
 ===== CHANNEL f1 =====  
 NUC1 13C  
 P1 9.00 usec  
 PL1 1.00 dB  
 PL1W 79.41143799 W  
 SFO1 125.7703643 MHz  
 ===== CHANNEL f2 =====  
 CPDPRG2 waltz16  
 NUC2 1H  
 PCPD2 80.00 usec  
 PL2 1.00 dB  
 PL12 16.14 dB  
 PL13 16.14 dB  
 PL2W 12.47038937 W  
 PL12W 0.38183883 W  
 PL13W 0.38183883 W  
 SFO2 500.1320005 MHz  
 SI 32768  
 SF 125.7577681 MHz  
 NDW EM  
 SSB 0  
 LB 1.00 Hz  
 GB 0  
 PC 1.40

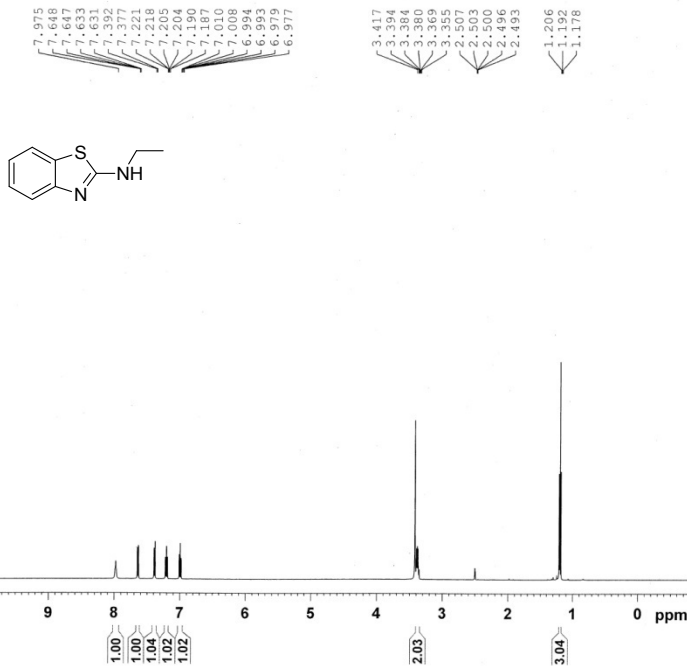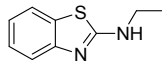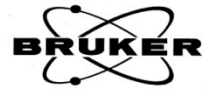

393  
NAME zengweilan20131005  
EXPNO 9  
PROCNO 1  
Date 20131005  
Time 18.52  
INSTRUM spect  
PROBHD 5 mm PABBO BB-  
PULPROG zg30  
TD 65536  
SOLVENT DMSO  
NS 16  
DS 2  
SWH 10330.578 Hz  
FIDRES 0.157632 Hz  
AQ 3.171923 sec  
RG 50.8  
DW 48.400 usec  
DE 6.50 usec  
TE 269.4 K  
D1 1.00000000 sec  
TDO 1

===== CHANNEL f1 =====  
NUC1 1H  
P1 14.00 usec  
PL1 1.00 dB  
PL1W 12.47038937 W  
SF01 500.1330885 MHz  
SI 32768  
SF 500.1300038 MHz  
WDW no  
SSB 0  
LB 0.00 Hz  
GB 0  
PC 1.00

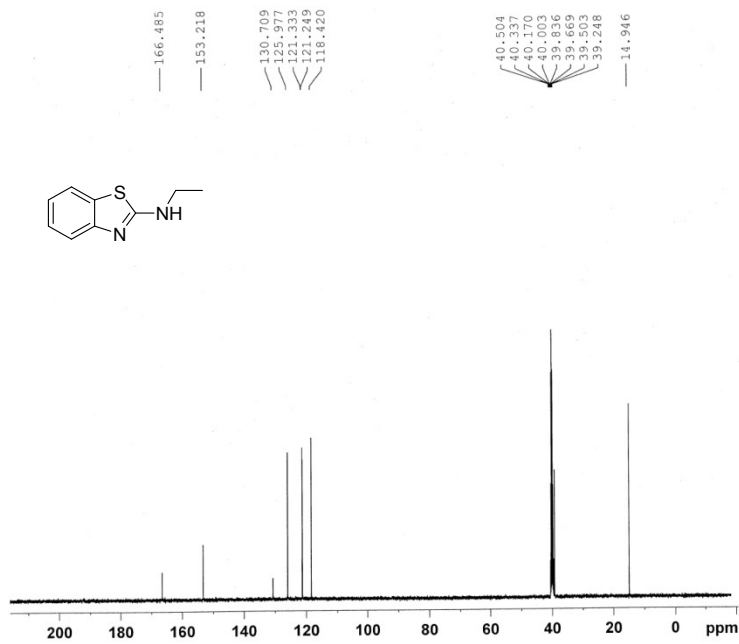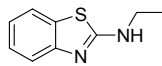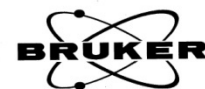

393  
NAME zengweilan20131005  
EXPNO 10  
PROCNO 1  
Date 20131005  
Time 18.55  
INSTRUM spect  
PROBHD 5 mm PABBO BB-  
PULPROG zgpg30  
TD 65536  
SOLVENT DMSO  
NS 100  
DS 4  
SWH 29761.904 Hz  
FIDRES 0.454131 Hz  
AQ 1.1010548 sec  
RG 2050  
DW 16.800 usec  
DE 6.50 usec  
TE 270.1 K  
D1 2.00000000 sec  
D11 0.03000000 sec  
TDO 1

===== CHANNEL f1 =====  
NUC1 13C  
P1 9.00 usec  
PL1 1.00 dB  
PL1W 79.41143799 W  
SF01 125.7703643 MHz

===== CHANNEL f2 =====  
CPDPRG2 waltz16  
NUC2 1H  
PCPD2 80.00 usec  
PL2 1.00 dB  
PL12 16.14 dB  
PL13 16.14 dB  
EL2W 12.47038937 W  
PL12W 0.38183883 W  
PL13W 0.38183883 W  
SF02 500.1320005 MHz  
SI 32768  
SF 125.7577850 MHz  
WDW EM  
SSB 0  
LB 1.00 Hz  
GB 0  
PC 1.40

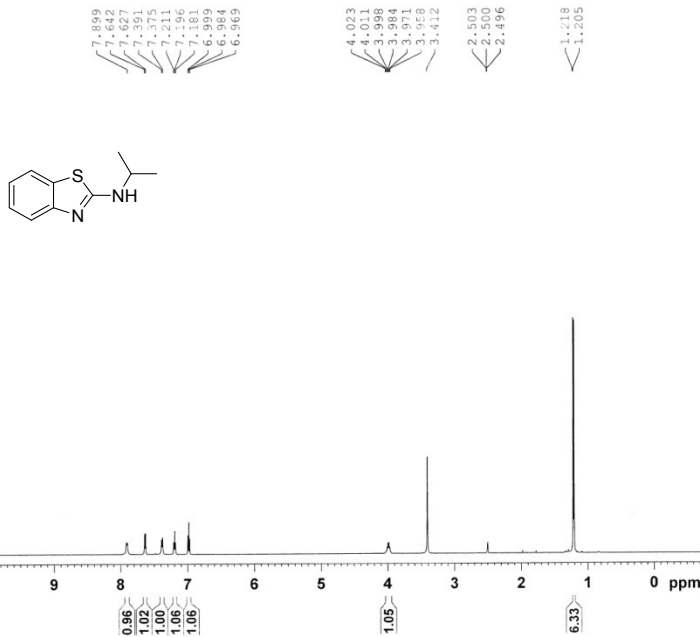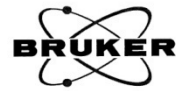

392

```

NAME      zengweilan20131005
EXPNO     5
PROCNO    1
Date_     20131005
Time      11.16
INSTRUM   spect
PROBHD    5 mm PABBO BB-
PULPROG   zg30
TD        65536
SOLVENT   DMSO
NS        16
DS        2
SWH       10330.578 Hz
FIDRES    0.157632 Hz
AQ        3.1719923 sec
RG        181
DW        48.400 usec
DE        6.50 usec
TE        268.7 K
DL        1.00000000 sec
TDO       1
  
```

```

===== CHANNEL f1 =====
NUC1      1H
P1        14.00 usec
PL1       1.00 dB
PL1W     12.47038937 W
SFO1     500.1330885 MHz
SI        32768
SF        500.1300038 MHz
WDW       no
SSB       0
LB        0.00 Hz
GB        0
PC        1.00
  
```

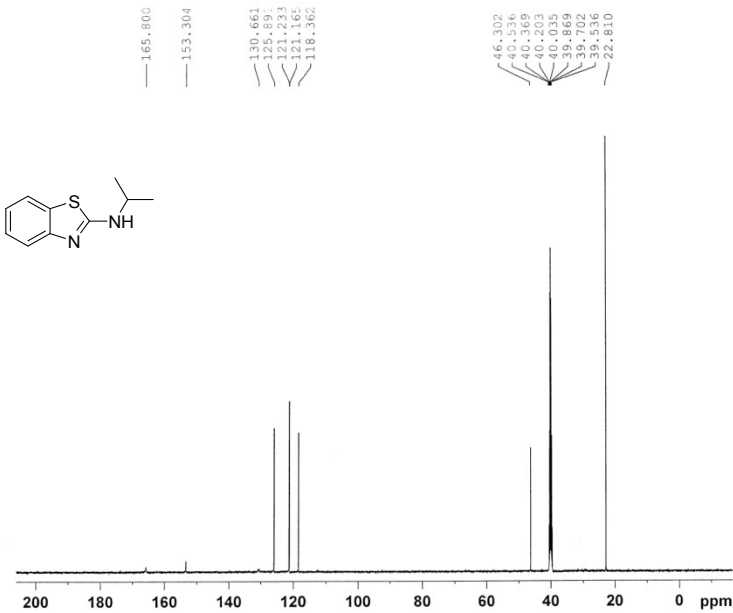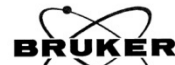

392

```

NAME      zengweilan20131005
EXPNO     6
PROCNO    1
Date_     20131005
Time      18.29
INSTRUM   spect
PROBHD    5 mm PABBO BB-
PULPROG   zgpg30
TD        65536
SOLVENT   DMSO
NS        304
DS        4
SWH       29761.904 Hz
FIDRES    0.454131 Hz
AQ        1.1010548 sec
RG        2050
DW        16.800 usec
DE        6.50 usec
TE        259.4 K
DL        2.00000000 sec
D11       0.03000000 sec
TDO       1
  
```

```

===== CHANNEL f1 =====
NUC1      13C
P1        9.00 usec
PL1       1.00 dB
PL1W     79.41143759 W
SFO1     125.7703643 MHz
  
```

```

===== CHANNEL f2 =====
PCPDPRG2  waltz16
NUC2      1H
PCPD2     80.00 usec
PL2       1.00 dB
PL12     16.14 dB
PL13     16.14 dB
PL2W     12.47038937 W
PL12W    0.38183883 W
PL13W    0.38183883 W
SFO2     500.1320005 MHz
SI        32768
SF        125.7577886 MHz
WDW       EM
SSB       0
LB        1.00 Hz
GB        0
PC        1.40
  
```

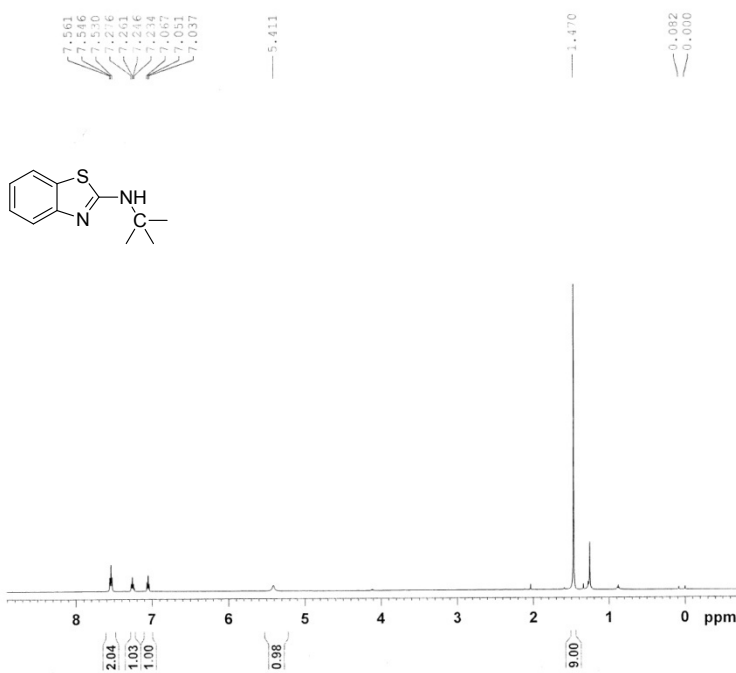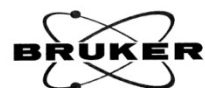

H-W223

NAME zengweilan20130503  
 EXPNO 1  
 PROCNO 1  
 Date\_ 20130503  
 Time 14.59  
 INSTRUM spect  
 PROBHD 5 mm PABBO BB-  
 PULPROG zg30  
 TD 65536  
 SOLVENT CDC13  
 NS 16  
 DS 2  
 SWH 10330.578 Hz  
 FIDRES 0.157632 Hz  
 AQ 3.1719923 sec  
 RG 45.2  
 DW 48.400 usec  
 DE 6.50 usec  
 TE 297.8 K  
 D1 1.0000000 sec  
 TD0 1

===== CHANNEL f1 =====  
 NUC1 1H  
 P1 14.60 usec  
 PL1 2.00 dB  
 PL1W 9.90558243 W  
 SFO1 500.1330885 MHz  
 SI 32768  
 SF 500.1300252 MHz  
 WF no  
 SSB 0  
 LB 0.00 Hz  
 GB 0  
 PC 1.00

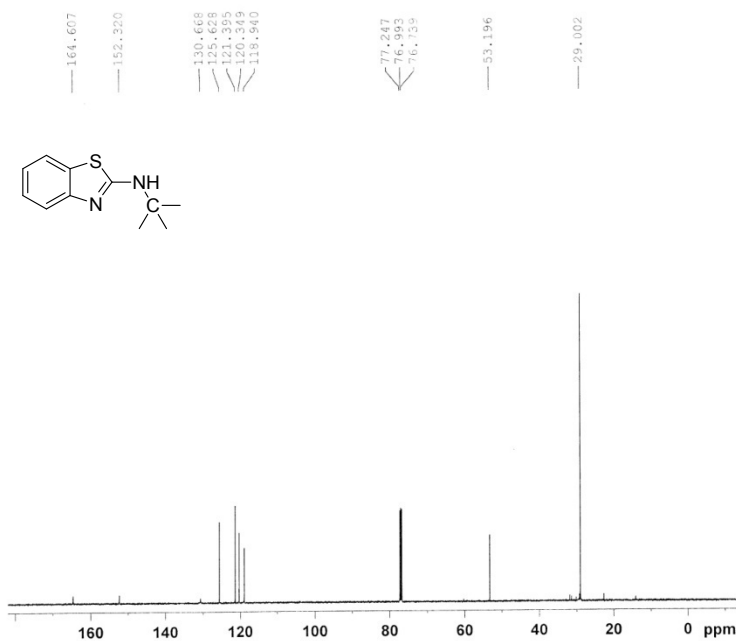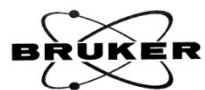

C-W223

NAME zengweilan20130503  
 EXPNO 2  
 PROCNO 1  
 Date\_ 20130503  
 Time 15.04  
 INSTRUM spect  
 PROBHD 5 mm PABBO BB-  
 PULPROG zgpg30  
 TD 65536  
 SOLVENT CDC13  
 NS 129  
 DS 4  
 SWH 29761.904 Hz  
 FIDRES 0.454131 Hz  
 AQ 1.1010548 sec  
 RG 2050  
 DW 16.800 usec  
 DE 6.50 usec  
 TE 299.2 K  
 D1 2.0000000 sec  
 D11 0.0300000 sec  
 TD0 1

===== CHANNEL f1 =====  
 NUC1 13C  
 P1 9.80 usec  
 PL1 2.80 dB  
 PL1W 52.46661758 W  
 SFO1 125.7703643 MHz

===== CHANNEL f2 =====  
 CDEPRG2 waltz16  
 NUC2 1H  
 PCPD2 80.00 usec  
 PL2 2.00 dB  
 PL12 16.89 dB  
 PL13 16.70 dB  
 PL2W 9.90558243 W  
 PL12W 0.3212732 W  
 PL13W 0.33564481 W  
 SFO2 500.1320005 MHz  
 SI 32768  
 SF 125.7578022 MHz  
 WDW EM  
 SSB 0  
 LB 1.00 Hz  
 GB 0  
 PC 1.40

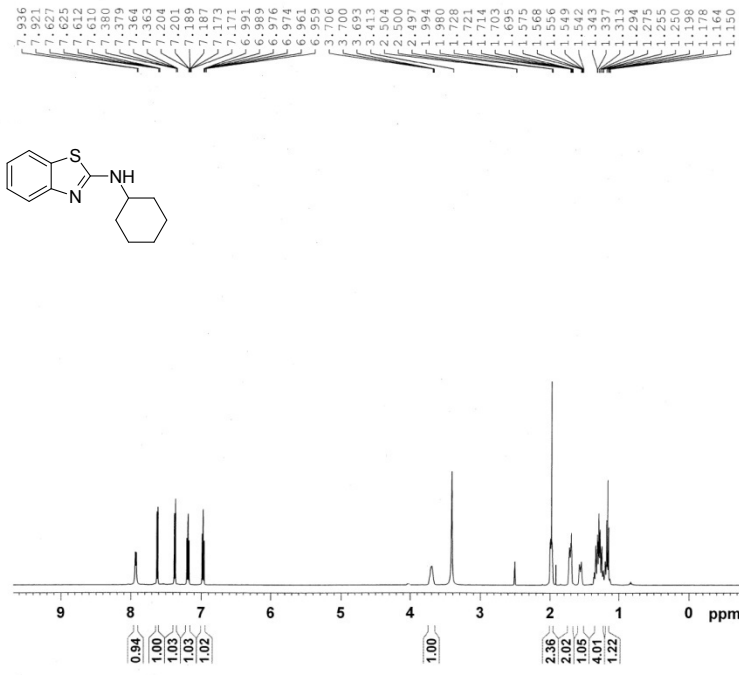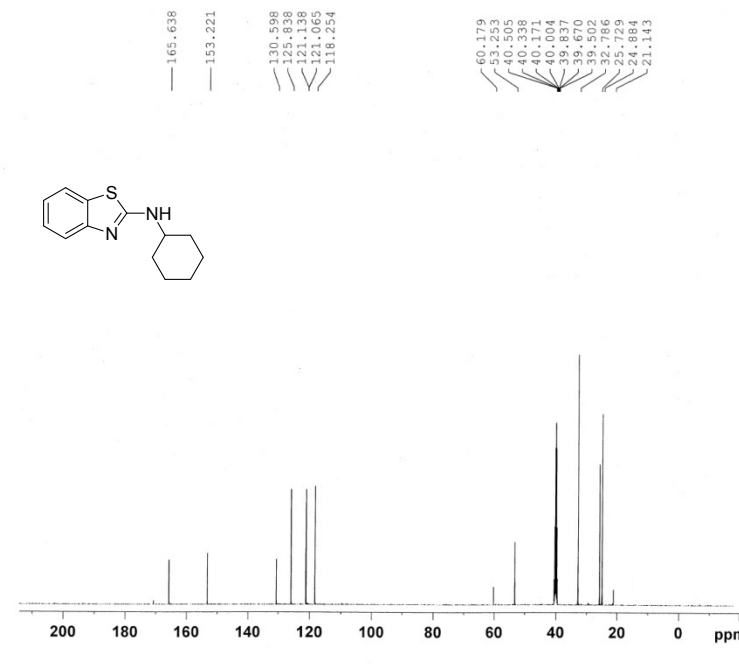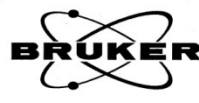

396  
NAME zengweilan20131005  
EXPNO 11  
PROCNO 1  
Date 20131005  
Time 19.02  
INSTRUM spect  
PROBHD 5 mm PABBO BB-  
PULPROG zg30  
TD 65536  
SOLVENT DMSO  
NS 16  
DS 2  
SWH 10330.578 Hz  
FIDRES 0.157632 Hz  
AQ 3.1719923 sec  
RG 40.3  
DW 48.400 usec  
DE 6.50 usec  
TE 269.0 K  
D1 1.00000000 sec  
TDO 1

===== CHANNEL f1 =====  
NUC1 1H  
P1 14.00 usec  
PL1 1.00 dB  
PL1W 12.47038937 W  
SFO1 500.1330885 MHz  
SI 32768  
SF 500.1300035 MHz  
WDW no  
SSB 0  
LB 0.00 Hz  
GB 0  
PC 1.00

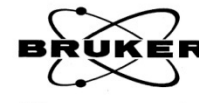

396  
NAME zengweilan20131005  
EXPNO 12  
PROCNO 1  
Date 20131005  
Time 19.11  
INSTRUM spect  
PROBHD 5 mm PABBO BB-  
PULPROG zgpg30  
TD 65536  
SOLVENT DMSO  
NS 198  
DS 4  
SWH 29761.904 Hz  
FIDRES 0.454131 Hz  
AQ 1.1010548 sec  
RG 2050  
DW 16.800 usec  
DE 6.50 usec  
TE 271.5 K  
D1 2.00000000 sec  
D11 0.03000000 sec  
TDO 1

===== CHANNEL f1 =====  
NUC1 13C  
P1 9.00 usec  
PL1 1.00 dB  
PL1W 79.41143799 W  
SFO1 125.7703643 MHz  
===== CHANNEL f2 =====  
CPDPRG2 waltz16  
NUC2 1H  
PCPD2 80.00 usec  
FL2 1.00 dB  
PL12 16.14 dB  
PL13 16.14 dB  
PL2W 12.47038937 W  
PL12W 0.38183883 W  
PL13W 0.38183883 W  
SFO2 500.1320005 MHz  
SI 32768  
SF 125.7577913 MHz  
WDW EM  
SSB 0  
LB 1.00 Hz  
GB 0  
PC 1.40

8.124  
7.622  
7.621  
7.620  
7.617  
7.615  
7.614  
7.435  
7.420  
7.419  
7.418  
7.288  
7.289  
7.285  
7.274  
7.271  
7.258  
7.241  
7.241  
7.229  
7.229  
7.224  
7.218  
7.210  
7.208  
7.204  
7.030  
7.028  
7.028  
7.013  
7.013  
7.000  
6.997  
3.636  
3.622  
3.611  
3.607  
3.605  
3.602  
2.947  
2.932  
2.918  
2.918  
2.504  
2.500  
2.496

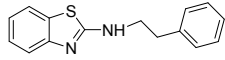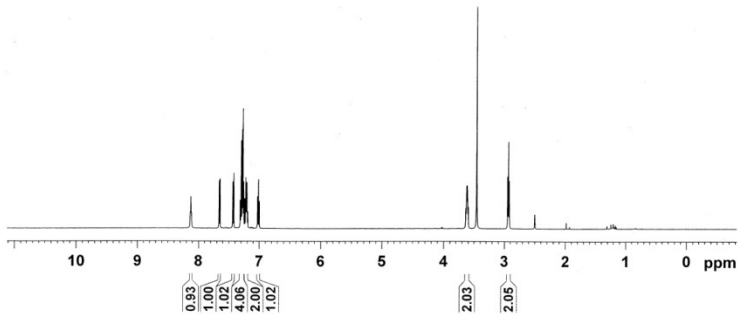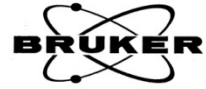

387  
NAME zengweilan20131005  
EXPNO 1  
PROCNO 1  
Date 20131005  
Time 10.52  
INSTRUM spect  
PROBHD 5 mm PABBO BB-  
PULPROG zg30  
TD 65536  
SOLVENT DMSO  
NS 16  
DS 2  
SWH 10330.578 Hz  
FIDRES 0.157632 Hz  
AQ 3.1719923 sec  
RG 40.3  
DW 48.400 usec  
DE 6.50 usec  
TE 268.6 K  
D1 1.0000000 sec  
TDO 1  
----- CHANNEL f1 -----  
NUC1 1H  
P1 14.00 usec  
PL1 1.00 dB  
PL1W 12.47038937 W  
SFO1 500.1330885 MHz  
SI 32768  
SF 500.1300035 MHz  
WDW no  
SSB 0  
LB 0.00 Hz  
GB 0  
PC 1.00

166.505  
153.164  
139.813  
130.783  
128.834  
128.834  
126.644  
126.010  
121.354  
118.543  
45.878  
40.506  
40.340  
40.173  
40.006  
39.832  
39.506  
35.198

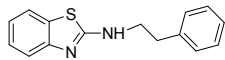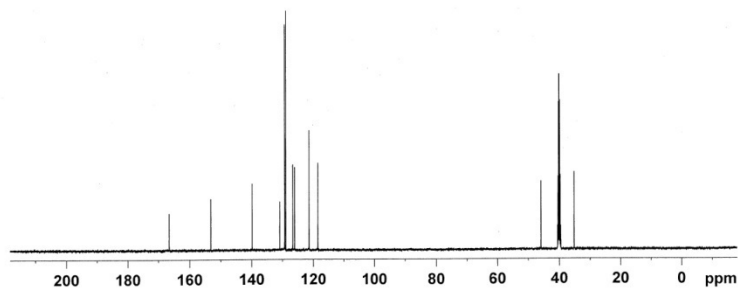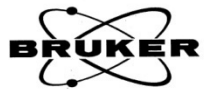

387  
NAME zengweilan20131005  
EXPNO 2  
PROCNO 1  
Date 20131005  
Time 10.56  
INSTRUM spect  
PROBHD 5 mm PABBO BB-  
PULPROG zgpg30  
TD 65536  
SOLVENT DMSO  
NS 127  
DS 4  
SWH 29761.904 Hz  
FIDRES 0.454131 Hz  
AQ 1.1010548 sec  
RG 2050  
DW 16.800 usec  
DE 6.50 usec  
TE 268.4 K  
D1 2.0000000 sec  
D11 0.0300000 sec  
TDO 1  
----- CHANNEL f1 -----  
NUC1 13C  
P1 9.00 usec  
PL1 1.00 dB  
PL1W 79.41143799 W  
SFO1 125.7703643 MHz  
----- CHANNEL f2 -----  
CPDPRG2 waltz16  
NUC2 1H  
PCPD2 80.00 usec  
PL2 1.00 dB  
PL12 16.14 dB  
PL13 16.14 dB  
PL2W 12.47038937 W  
PL12W 0.38183883 W  
PL13W 0.38183883 W  
SFO2 500.1320005 MHz  
SI 32768  
SF 125.7577859 MHz  
WDW EQ  
SSB 0  
LB 1.00 Hz  
GB 0  
PC 1.40

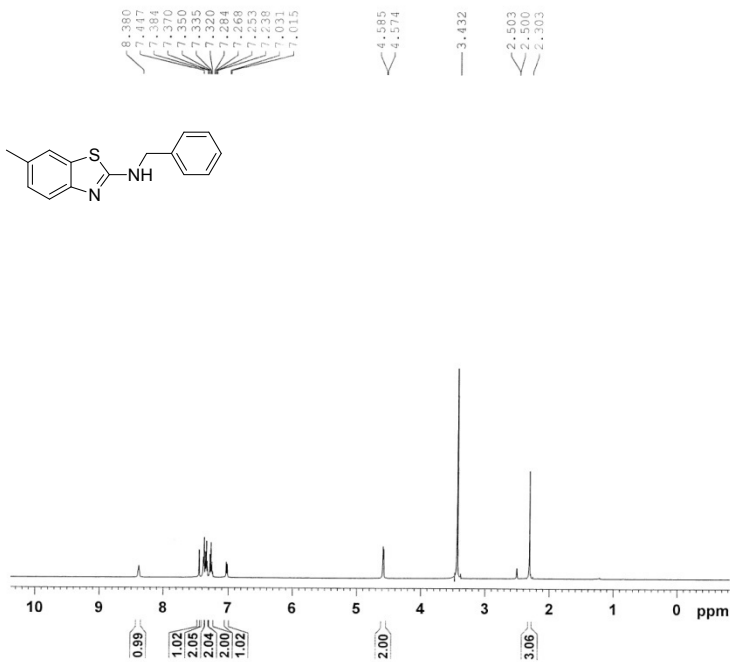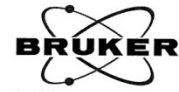

414

```

NAME zengweilan20131020
EXPNO 3
PROCNO 1
Date_ 20131020
Time 11:59
INSTRUM spect
PROBHD 5 mm PABBO BB-
PULPROG zg30
TD 65536
SOLVENT DMSO
NS 16
DS 2
SWH 10330.578 Hz
FIDRES 0.157632 Hz
AQ 3.1719923 sec
RG 228
DW 48.400 usec
DE 6.50 usec
TE 269.9 K
D1 1.00000000 sec
TD0 1

===== CHANNEL f1 =====
NUC1 1H
P1 14.00 usec
PL1 1.00 dB
PL1W 12.47038937 W
SFO1 500.1330885 MHz
SI 32768
SF 500.1300032 MHz
WDW no
SSB 0
LB 0.00 Hz
GB 0
PC 1.00
  
```

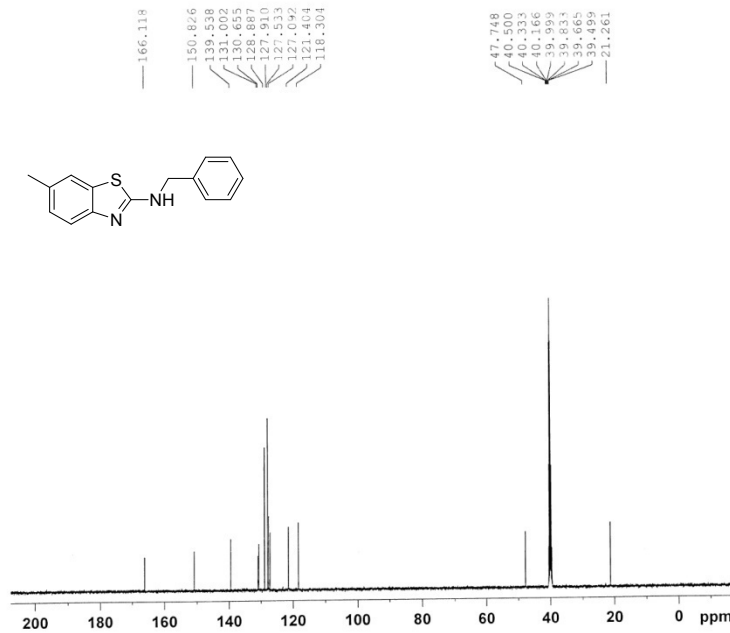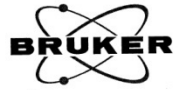

414

```

NAME zengweilan20131020
EXPNO 4
PROCNO 1
Date_ 20131020
Time 12:08
INSTRUM spect
PROBHD 5 mm PABBO BB-
PULPROG zgpg30
TD 65536
SOLVENT DMSO
NS 193
DS 4
SWH 29761.904 Hz
FIDRES 0.454131 Hz
AQ 1.1010548 sec
RG 2050
DW 16.800 usec
DE 6.50 usec
TE 271.0 K
D1 2.00000000 sec
D11 0.03000000 sec
TD0 1

===== CHANNEL f1 =====
NUC1 13C
P1 9.00 usec
PL1 1.00 dB
PL1W 79.41143799 W
SFO1 125.7703643 MHz

===== CHANNEL f2 =====
CPDPRG2 waltz16
NUC2 1H
PCPD2 80.00 usec
PL2 1.00 dB
PL12 16.14 dB
PL13 16.14 dB
PL2W 12.47038937 W
PL12W 0.38183883 W
PL13W 0.38183883 W
SFO2 500.1320005 MHz
SI 32768
SF 125.7577814 MHz
WDW EM
SSB 0
TE 1.00 usec
  
```

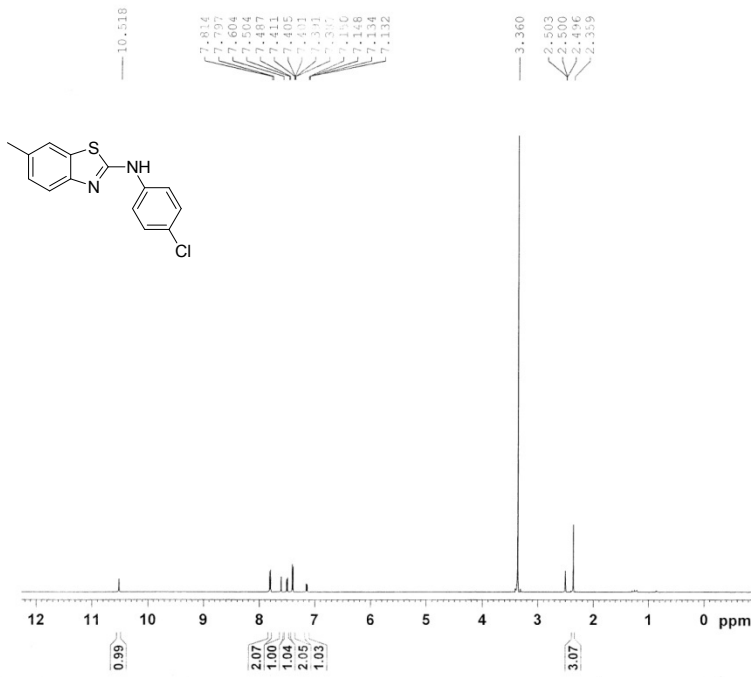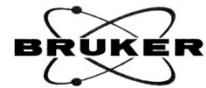

H-344  
 NAME zengweilian20130827  
 EXPNO 3  
 PROCNO 1  
 Date\_ 20130827  
 Time 15.52  
 INSTRUM spect  
 PROBHD 5 mm PABBO BB-  
 PULPROG zg30  
 TD 65536  
 SOLVENT DMSO  
 NS 16  
 DS 2  
 SWH 10330.578 Hz  
 FIDRES 0.157632 Hz  
 AQ 3.1719923 sec  
 RG 228  
 DW 48.400 usec  
 DE 6.50 usec  
 TE 269.0 K  
 D1 1.0000000 sec  
 TDO 1

===== CHANNEL f1 =====  
 NUC1 1H  
 P1 14.00 usec  
 PL1 1.00 dB  
 PL1W 12.47038937 W  
 SFO1 500.1330885 MHz  
 SI 32768  
 SF 500.1300038 MHz  
 WDW no  
 SSB 0  
 LB 0.00 Hz  
 GB 0  
 PC 1.00

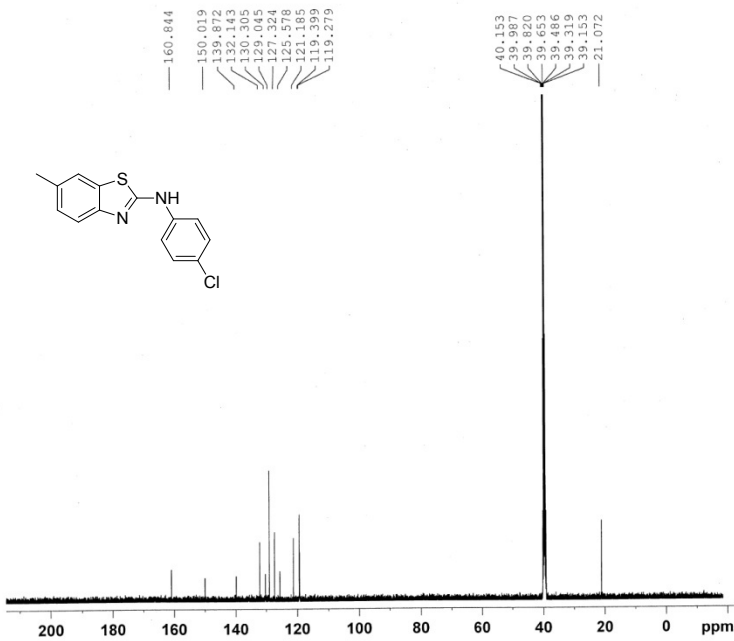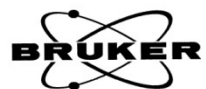

H-344  
 NAME zengweilian20130827  
 EXPNO 4  
 PROCNO 1  
 Date\_ 20130904  
 Time 21.03  
 INSTRUM spect  
 PROBHD 5 mm PABBO BB-  
 PULPROG zgpg30  
 TD 65536  
 SOLVENT DMSO  
 NS 210  
 DS 4  
 SWH 29761.904 Hz  
 FIDRES 0.454131 Hz  
 AQ 1.1010548 sec  
 RG 2050  
 DW 16.800 usec  
 DE 6.50 usec  
 TE 272.7 K  
 D1 2.0000000 sec  
 D11 0.0300000 sec  
 TDO 1

===== CHANNEL f1 =====  
 NUC1 13C  
 P1 9.00 usec  
 PL1 1.00 dB  
 PL1W 79.41143799 W  
 SFO1 125.7703643 MHz

===== CHANNEL f2 =====  
 CPDPRG2 waltz16  
 NUC2 1H  
 PCPD2 80.00 usec  
 PL2 1.00 dB  
 PL12 16.14 dB  
 PL13 16.14 dB  
 PL2W 12.47038937 W  
 PL12W 0.38183883 W  
 PL13W 0.38183883 W  
 SFO2 500.1330005 MHz  
 SI 32768  
 SF 125.7578149 MHz  
 WDW EM  
 SSB 0  
 LB 1.00 Hz  
 GB 0  
 PC 1.40



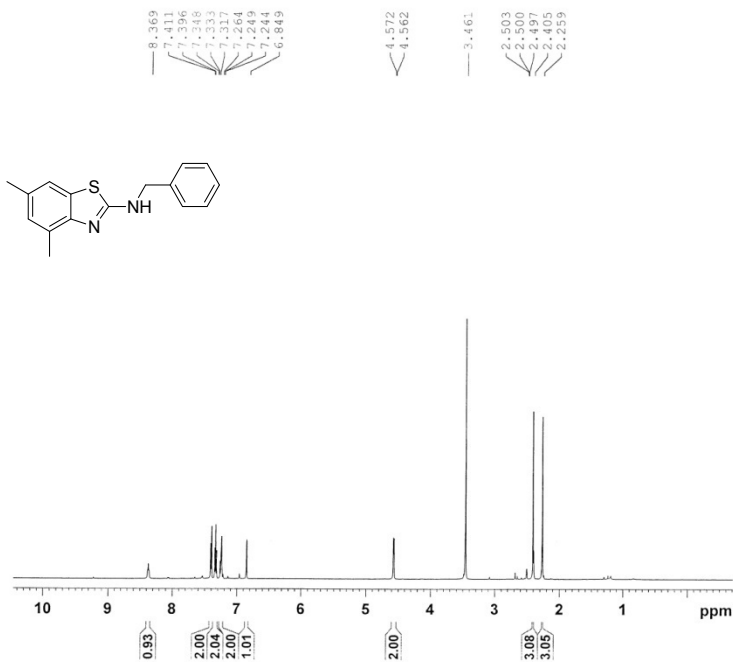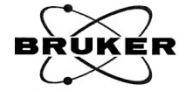

415

```

NAME      zengweilan20131020
EXPNO     1
PROCNO    1
Date_     20131020
Time_     11.46
INSTRUM   spect
PROBHD    5 mm PABBO BB-
PULPROG   zg30
TD         65536
SOLVENT   DMSO
NS         16
DS         2
SWH        10330.578 Hz
FIDRES     0.157632 Hz
AQ         3.1719923 sec
RG         40.3
DW         48.400 usec
DE         6.50 usec
TE         269.8 K
D1         1.00000000 sec
TD0        1

===== CHANNEL f1 =====
NUC1       1H
P1         14.00 usec
PL1        1.00 dB
PL1W       12.47038937 W
SFO1       500.1330885 MHz
SI         32768
SF         500.1300035 MHz
WDW        no
SSB        0
LB         0.00 Hz
GB         0
PC         1.00
  
```

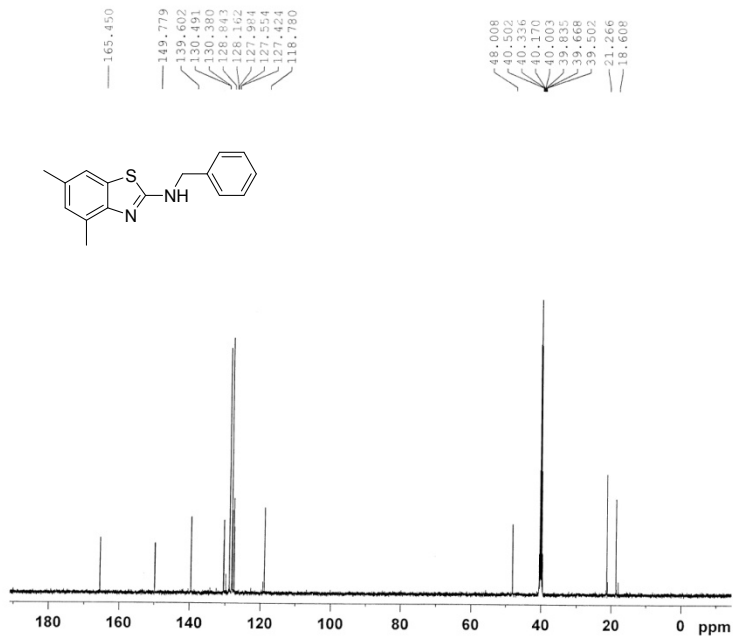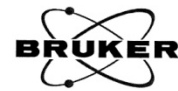

415

```

NAME      zengweilan20131020
EXPNO     2
PROCNO    1
Date_     20131020
Time_     11.52
INSTRUM   spect
PROBHD    5 mm PABBO BB-
PULPROG   zgpg30
TD         65536
SOLVENT   DMSO
NS         141
DS         4
SWH        29761.904 Hz
FIDRES     0.454131 Hz
AQ         1.1010548 sec
RG         2050
DW         16.800 usec
DE         6.50 usec
TE         270.5 K
D1         2.00000000 sec
D11        0.03000000 sec
TD0        1

===== CHANNEL f1 =====
NUC1       13C
P1         9.00 usec
PL1        1.00 dB
PL1W       79.41143799 W
SFO1       125.7703643 MHz

===== CHANNEL f2 =====
CPDPRG2   waltz16
NUC2       1H
PCPD2     80.00 usec
PL2        1.00 dB
PL12       16.14 dB
PL13       16.14 dB
PL2W       12.47038937 W
PL12W      0.38183883 W
PL13W      0.38183883 W
SFO2       500.1320005 MHz
SI         32768
SF         125.7577804 MHz
WDW        EM
SSB        0
PC         1.00 usec
  
```

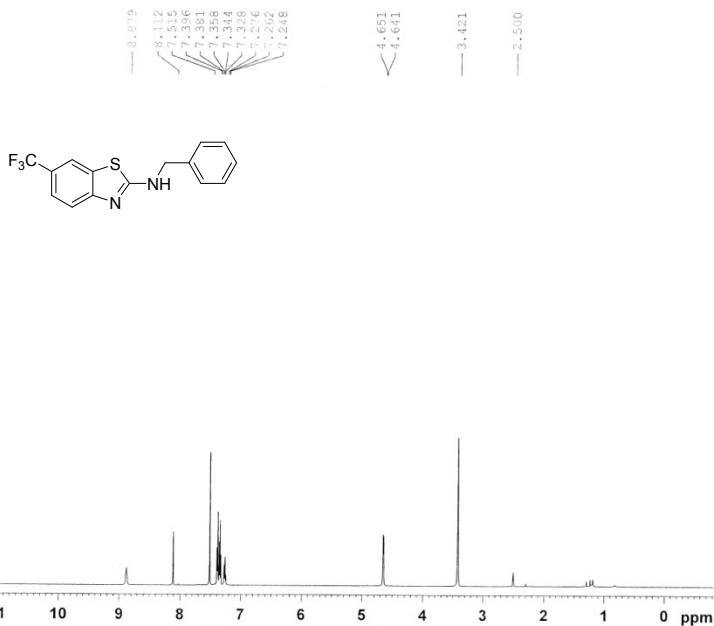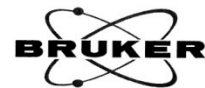

```

417
NAME zengweilan20131020
EXPNO 11
PROCNO 1
Date_ 20131020
Time 12.34
INSTRUM spect
PROBHD 5 mm PABBO BB-
PULPROG zg30
TD 65536
SOLVENT DMSO
NS 16
DS 2
SWH 10330.578 Hz
FIDRES 0.157632 Hz
AQ 3.1719923 sec
RG 228
DW 48.400 usec
DE 6.50 usec
TE 269.8 K
D1 1.0000000 sec
TDO 1
  
```

```

===== CHANNEL f1 =====
NUC1 1H
P1 14.00 usec
PL1 1.00 dB
PL1W 12.47038937 W
SF01 500.1330885 MHz
SI 32768
SF 500.1300035 MHz
WDW no
SSB 0
LB 0.00 Hz
GB 0
FC 1.00
  
```

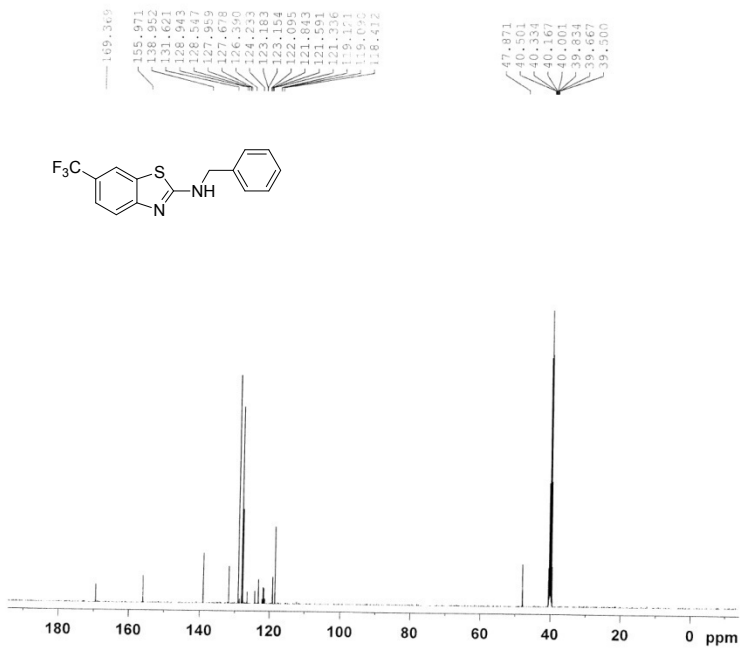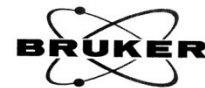

```

417
NAME zengweilan20131020
EXPNO 12
PROCNO 1
Date_ 20131020
Time 12.39
INSTRUM spect
PROBHD 5 mm PABBO BB-
PULPROG zgpg30
TD 65536
SOLVENT DMSO
NS 172
DS 4
SWH 29761.904 Hz
FIDRES 0.454131 Hz
AQ 1.1010548 sec
RG 2050
DW 16.800 usec
DE 6.50 usec
TE 270.7 K
D1 2.0000000 sec
D11 0.0300000 sec
TDO 1
  
```

```

===== CHANNEL f1 =====
NUC1 13C
P1 9.00 usec
PL1 1.00 dB
PL1W 79.41143799 W
SF01 125.7703643 MHz
  
```

```

===== CHANNEL f2 =====
CPDPRG2 waltz16
NUC2 1H
PCPD2 80.00 usec
PL2 1.00 dB
PL12 16.14 dB
PL13 16.14 dB
PL2W 12.47038937 W
PL12W 0.38183883 W
PL13W 0.38183883 W
SF02 500.1320005 MHz
SI 32768
SF 125.7577823 MHz
WDW SK
SSB 0
LB 1.00 Hz
GB 0
FC 1.40
  
```

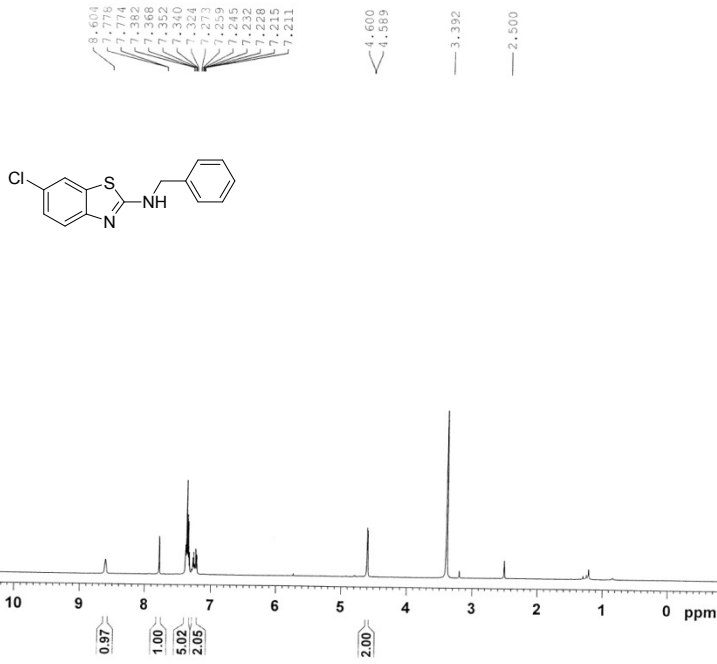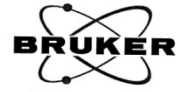

420

```

NAME      zengweilan20131020
EXPNO     13
PROCNO    1
Date_     20131020
Time      12.50
INSTRUM   spect
PROBHD    5 mm PABBO BB-
PULPROG   zg30
TD         65536
SOLVENT   DMSO
NS         16
DS         2
SWH       10330.578 Hz
FIDRES    0.157632 Hz
AQ         3.1719923 sec
RG         256
DW         48.400 usec
DE         6.50 usec
TE         270.5 K
D1         1.0000000 sec
TD0        1
  
```

```

===== CHANNEL f1 =====
NUC1      1H
P1        14.00 usec
PL1       1.00 dB
PL1W     12.47038937 W
SF01     500.1330885 MHz
SI        32768
SF        500.1300036 MHz
WDW       no
SSB       0
LB        0.00 Hz
GB        0
PC        1.00
  
```

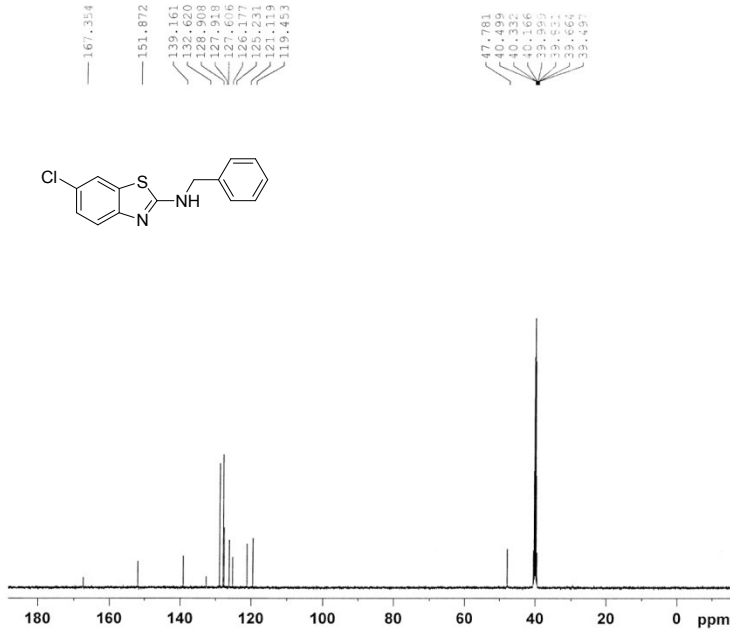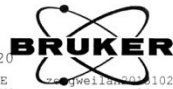

420

```

NAME      zengweilan20131020
EXPNO     14
PROCNO    1
Date_     20131020
Time      12.57
INSTRUM   spect
PROBHD    5 mm PABBO BB-
PULPROG   zgpg30
TD         65536
SOLVENT   DMSO
NS         170
DS         4
SWH       29761.904 Hz
FIDRES    0.454131 Hz
AQ         1.1010548 sec
RG         2050
DW         16.800 usec
DE         6.50 usec
TE         270.6 K
D1         2.0000000 sec
D11        0.03000000 sec
TD0        1
  
```

```

===== CHANNEL f1 =====
NUC1      13C
P1        9.00 usec
PL1       1.00 dB
PL1W     79.41143799 W
SF01     125.7703643 MHz
  
```

```

===== CHANNEL f2 =====
CPDPRG2   waltz16
NUC2      1H
FCPD2     80.00 usec
PL2       1.00 dB
PL12     16.14 dB
PL13     16.14 dB
PL12W    12.47038937 W
PL13W    0.38183883 W
SF02     500.1320005 MHz
SI        32768
SF        125.7577850 MHz
WDW       EM
SSB       0
LB        1.00 Hz
GB        0
PC        1.40
  
```

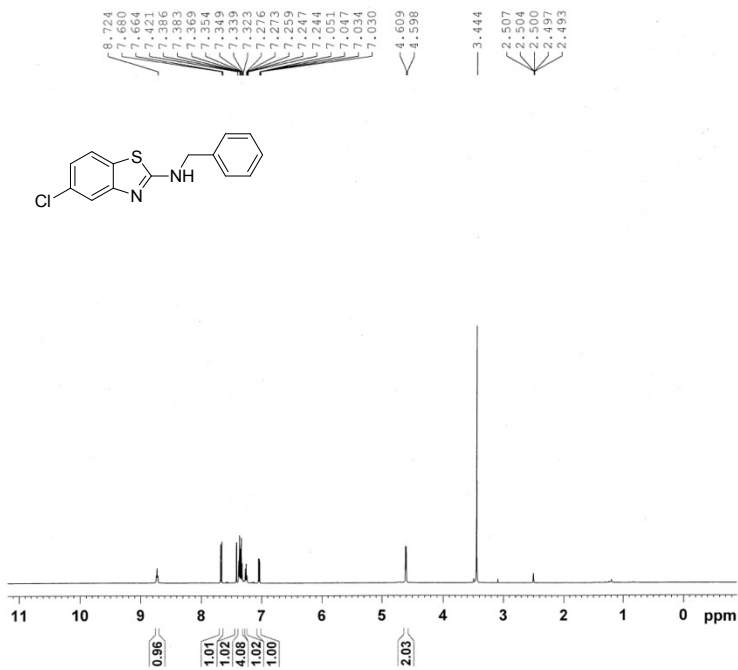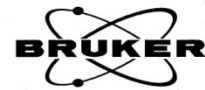

416  
 NAME zengweilan20131020  
 EXPNO 9  
 PROCNO 1  
 Date 20131020  
 Time 12.20  
 INSTRUM spect  
 PROBHD 5 mm PABBO BB-  
 PULPROG zg30  
 TD 65536  
 SOLVENT DMSO  
 NS 16  
 DS 2  
 SWH 10330.578 Hz  
 FIDRES 0.157632 Hz  
 AQ 3.1719923 sec  
 RG 50.8  
 DW 48.400 usec  
 DE 6.50 usec  
 TE 269.8 K  
 D1 1.00000000 sec  
 TDO 1  
 ===== CHANNEL f1 =====  
 NUC1 1H  
 P1 14.00 usec  
 PL1 1.00 dB  
 PL1W 12.47038937 W  
 SF01 500.1330885 MHz  
 SI 32768  
 SF 500.1300035 MHz  
 WDW no  
 SSB 0  
 LB 0.00 Hz  
 GB 0  
 PC 1.00

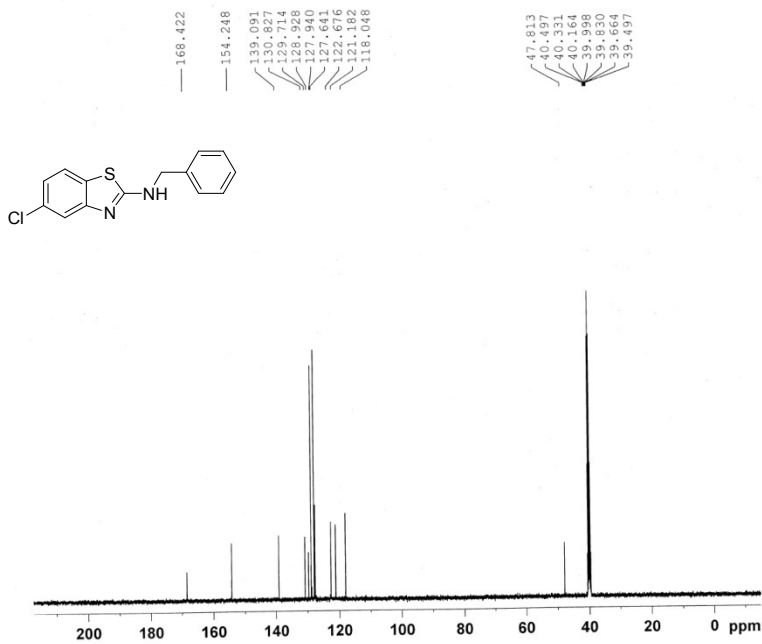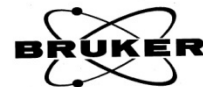

416  
 NAME zengweilan20131020  
 EXPNO 10  
 PROCNO 1  
 Date 20131020  
 Time 12.26  
 INSTRUM spect  
 PROBHD 5 mm PABBO BB-  
 PULPROG zgpg30  
 TD 65536  
 SOLVENT DMSO  
 NS 150  
 DS 4  
 SWH 29761.904 Hz  
 FIDRES 0.454131 Hz  
 AQ 1.1010548 sec  
 RG 2050  
 DW 16.800 usec  
 DE 6.50 usec  
 TE 270.4 K  
 D1 2.00000000 sec  
 D11 0.03000000 sec  
 TDO 1  
 ===== CHANNEL f1 =====  
 NUC1 13C  
 P1 9.00 usec  
 PL1 1.00 dB  
 PL1W 79.41143799 W  
 SF01 125.7703643 MHz  
 ===== CHANNEL f2 =====  
 CPDPRG2 waltz16  
 NUC2 1H  
 PCPD2 80.00 usec  
 PL2 1.00 dB  
 PL12 16.14 dB  
 PL13 16.14 dB  
 PL1W 12.47038937 W  
 PL12W 0.38183883 W  
 PL13W 0.38183883 W  
 SF02 500.1330005 MHz  
 SI 32768  
 SF 125.7577831 MHz  
 WDW EM  
 SSB 0  
 LB 1.00 Hz  
 GB 0  
 PC 1.40

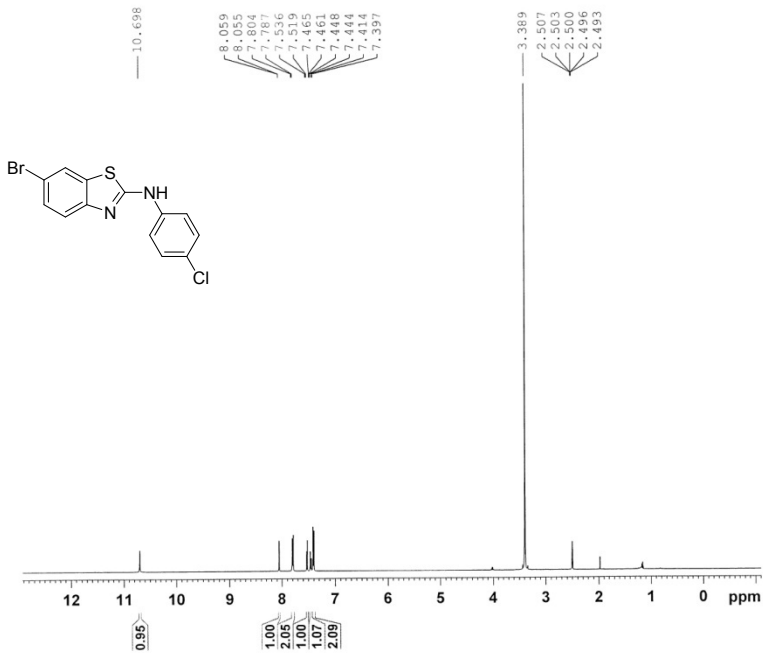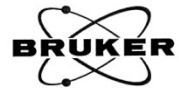

361

```

NAME      zengweilan20130910
EXPNO     3
PROCNO    1
Date_     20130910
Time      19.50
INSTRUM   spect
PROBHD    5 mm PABBO BB-
PULPROG   zg30
TD         65536
SOLVENT   DMSO
NS         16
DS         2
SWH        10330.578 Hz
FIDRES     0.157632 Hz
AQ         3.171923 sec
RG         161
DW         48.400 usec
DE         6.50 usec
TE         271.0 K
D1         1.00000000 sec
TDO        1

===== CHANNEL f1 =====
NUC1      1H
P1        14.00 usec
PL1       1.00 dB
PL1W      12.47038937 W
SFO1      500.1330885 MHz
SI        32768
SF         500.1300035 MHz
WDW       no
SSB       0
LB        0.00 Hz
GB         0
PC         1.00

```

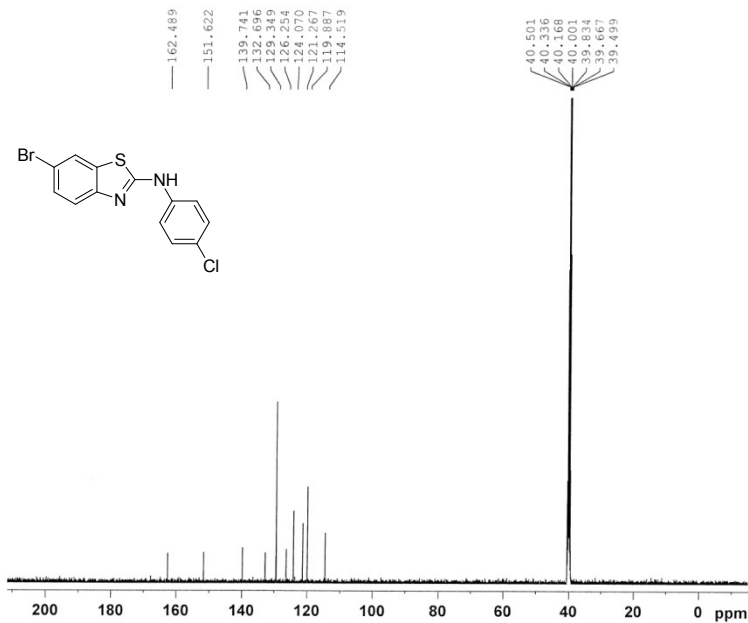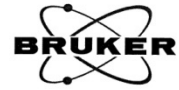

361

```

NAME      zengweilan20130910
EXPNO     4
PROCNO    1
Date_     20130910
Time      19.54
INSTRUM   spect
PROBHD    5 mm PABBO BB-
PULPROG   zgpg30
TD         65536
SOLVENT   DMSO
NS         200
DS         2
SWH        29761.904 Hz
FIDRES     0.454131 Hz
AQ         1.1010548 sec
RG         2050
DW         16.800 usec
DE         6.50 usec
TE         272.1 K
D1         2.00000000 sec
D11        0.03000000 sec
TDO        1

===== CHANNEL f1 =====
NUC1      13C
P1        9.00 usec
PL1       1.00 dB
PL1W      79.41143799 W
SFO1      125.7703643 MHz

===== CHANNEL f2 =====
CPDPRG2   waltz16
NUC2      1H
PCPD2     80.00 usec
PL2       1.00 dB
PL12      16.14 dB
PL13      16.14 dB
PL1W      12.47038937 W
PL12W     0.38183883 W
PL13W     0.38183883 W
SFO2      500.1320005 MHz
SI        32768
SF         125.7577869 MHz
WDW       EM
SSB       0
LB        1.00 Hz
GB         0
PC         1.40

```
